# Inferring sources of suboptimality in perceptual decision making using a causal inference task

Sabyasachi Shivkumar<sup>1,2</sup>, Madeline S. Cappelloni<sup>2,3,4</sup>, Ross K. Maddox<sup>2,3,4,5</sup>, Ralf M. Haefner<sup>1,2</sup>

<sup>1</sup>Brain and Cognitive Sciences, University of Rochester, Rochester, NY 14627, USA

<sup>2</sup>Center for Visual Science, University of Rochester, Rochester, NY 14627, USA

<sup>3</sup>Biomedical Engineering, University of Rochester, Rochester, NY 14627, USA

<sup>4</sup>Del Monte Institute for Neuroscience, University of Rochester, Rochester, NY 14627, USA

<sup>5</sup>Neuroscience, University of Rochester, Rochester, NY 14627, USA

## Abstract

Perceptual decision-making has been extensively modeled using the ideal observer framework. However, a range of deviations from optimality demand an extension of this framework to characterize the different sources of suboptimality. Prior work has mostly formalized these sources by adding biases and variability in the context of specific process models but are hard to generalize to more complex tasks. Here, we formalize suboptimalities as part of the brain’s probabilistic model of the task. Data from a traditional binary discrimination task cannot separate between different kinds of biases, or between sensory noise and approximate computations. We showed that this was possible using a recently developed causal inference task in which observers discriminated auditory cues in the presence of choice-uninformative visual cues. An extension of the task with different stimulus durations provided evidence for an increase in the precision of the computations with stimulus duration, separate from a decrease in observation noise.

## 1 Introduction

Much of our knowledge about how the brain converts sensory observations into percepts, and percepts into decisions, has been gained in the context of binary discrimination tasks. In such tasks, human behavior has often been found to be close to optimal under certain sensory noise distributions (Swets et al., 1961; Ernst and Banks, 2002). Normative modeling starts by specifying the experimenter’s probabilistic model that links observations to correct choices. It assumes that the brain has learned and uses this model to infer correct responses from its observations. These models are mathematical descriptions of how an optimal decision making agent (ideal observer) would make their decisions. Approaching complex systems like the brain through the lens of the ideal observer has provided us with guiding principles (Geisler, 2011). However, there is increasing evidence for suboptimalities in human behavior (reviewed in Rahnev and Denison (2018)) calling into question the utility of a normative approach (Bowers and Davis, 2012; Gardner, 2019). Instead of abandoning the ideal observer model completely, it has been suggested to use it as a starting point (Icard, 2018). To construct better models of human behavior it can be extended by incorporating increasingly realistic assumptions about its components (Rahnev and Denison, 2018).

There are two principal approaches to this process. The first approach starts with the generative model for the task. Suboptimalities arise from deviations in the brain’s internal model, and the fact that the inference computations are performed approximately instead of exactly. For example, systematic biases in observer responses have been modeled as arising due to observers using priors learned for natural behavior that are not optimal in laboratory settings (Stocker and Simoncelli, 2006; Odegaard et al., 2015; Ma, 2019). Similarly, approximations in the inference process can lead to substantial deviations from optimal behavior and have been shown to be an important source of suboptimality in decisions (Beck et al., 2012; Wyart and Koechlin, 2016; Drugowitsch et al., 2016). One way in which approximations in the inference computations have been quantified is by using a sampling-based approximation, where the number of samples quantifies the degree of approximation. Prior studies have found that observers are best described by few samples, corresponding to coarse approximations (Vul et al., 2014; Sanborn and Chater, 2016; Wozny et al., 2010).

26 The second approach starts with a process model that inverts the above generative model. This model  
27 optimally converts observations into responses (as defined for the ideal observer) and suboptimalities can  
28 be added to its components in the form of noise or bias. This approach was followed in recent attempts to  
29 dissociate between sensory and computational sources of suboptimality (Drugowitsch et al., 2016), and dif-  
30 ferent sources of biases (Linares et al., 2019). Most commonly, this approach uses the signal detection theory  
31 framework where a decision is made by comparing the observation against a criterion (Gold and Shadlen,  
32 2007; Green et al., 1966). Response biases can then be modeled as an incorrect placement of the criterion,  
33 and response variability as an inability to maintain a stable criterion (see Rahnev and Denison (2018) for a  
34 detailed review). Formalizing suboptimalities in a process model introduces the challenge that complicated  
35 probabilistic models (for more complex or naturalistic tasks) do not allow for implementation-agnostic mod-  
36 els to which variability or a bias can be applied as commonly done. Instead they require a commitment  
37 to how the inference computations are being implemented despite the fact that this implementation in the  
38 brain is still unknown (Pouget et al., 2013; Fiser et al., 2010). This problem is compounded by the fact that  
39 it is unclear to what degree different sources of suboptimality can be dissociated given empirical data from  
40 simple tasks (also a challenge in the first approach), driving the need for more complex tasks. For instance,  
41 (Linares et al., 2019) combined data from two task conditions to be able to dissociate perceptual biases  
42 from category biases. In order to dissociate sensory noise from approximate inference, (Lengyel et al., 2015)  
43 designed a dual-report estimation/confidence judgement task, and (Drugowitsch et al., 2016) designed a task  
44 requiring the accumulation of evidence across a variable number of pieces of evidence. Therefore separating  
45 sources of suboptimalities has required a need for using more complex tasks.

46 Here, we followed the first approach. We derived a formalization of decision making in binary discrimi-  
47 nation tasks under common Gaussian assumptions and showed that data from classic discrimination tasks  
48 cannot distinguish between perceptual and categorical biases, nor between sensory noise and approximate  
49 computations. In order to distinguish between these different sources of suboptimality, we applied our for-  
50 malization to a hierarchical causal inference model of audio-visual integration. Analyzing previously collected  
51 data (Cappelloni et al., 2019), we showed that data from this task dissociates all four sources of suboptimal  
52 inference described above. We also applied our model to an extension of the task with variable duration  
53 (Cappelloni et al., 2020) and showed that both the computational approximation becomes coarser, and the  
54 observation noise becomes larger, as the duration of the stimulus becomes shorter.

## 55 2 Results

56 Our Results section is organized as follows: we first formalize the different sources of suboptimalities in the  
57 context of classic binary discrimination tasks and demonstrate how different sources of bias and variability  
58 cannot be dissociated using data from classic discrimination tasks. We next apply the same formalization to  
59 a recent task which does allow for such a dissociation. Finally, we show that the improvement in behavioral  
60 performance with increasing stimulus duration is the result of *both* less sensory noise *and* more precise  
61 computations.

### 62 2.1 Sources of approximate decision-making in a binary discrimination task

63 In traditional binary discrimination tasks where the observer has to compare a cue against a reference  
64 boundary, the observer’s responses can be summarized using a psychometric curve (observer reports measured  
65 as a function of cue position). The psychometric curve is commonly characterized by bias (Figure 1A) and  
66 a threshold (Figure 1B). The bias can be equivalently measured (Figure 1A) as the proportion of ‘right’  
67 responses for cue position at the midline or the point of subjective equality (PSE) which is the cue position for  
68 which the observer reports ‘right’ and ‘left’ with equal probability. The threshold (Figure 1B) is proportional  
69 to the inverse slope around the PSE.

70 We formalize optimal decision-making by modeling it as Bayesian inference. We assume that the brain  
71 has learned an approximation to the generative model of the task, and that it inverts this model for inference  
72 and decision-making (Figure 1C). On every trial the experimenter chooses a ‘correct’ trial category ( $D_e$ ) and  
73 a stimulus, i.e. cue ( $s_e$ ). For concreteness, we will use a position discrimination task in line with the second  
74 part of the paper as an example but the formalization here holds in general. The observer observes a noisy  
75 version of the cue position that deviates from the experimenter defined value due to sources of noise that may

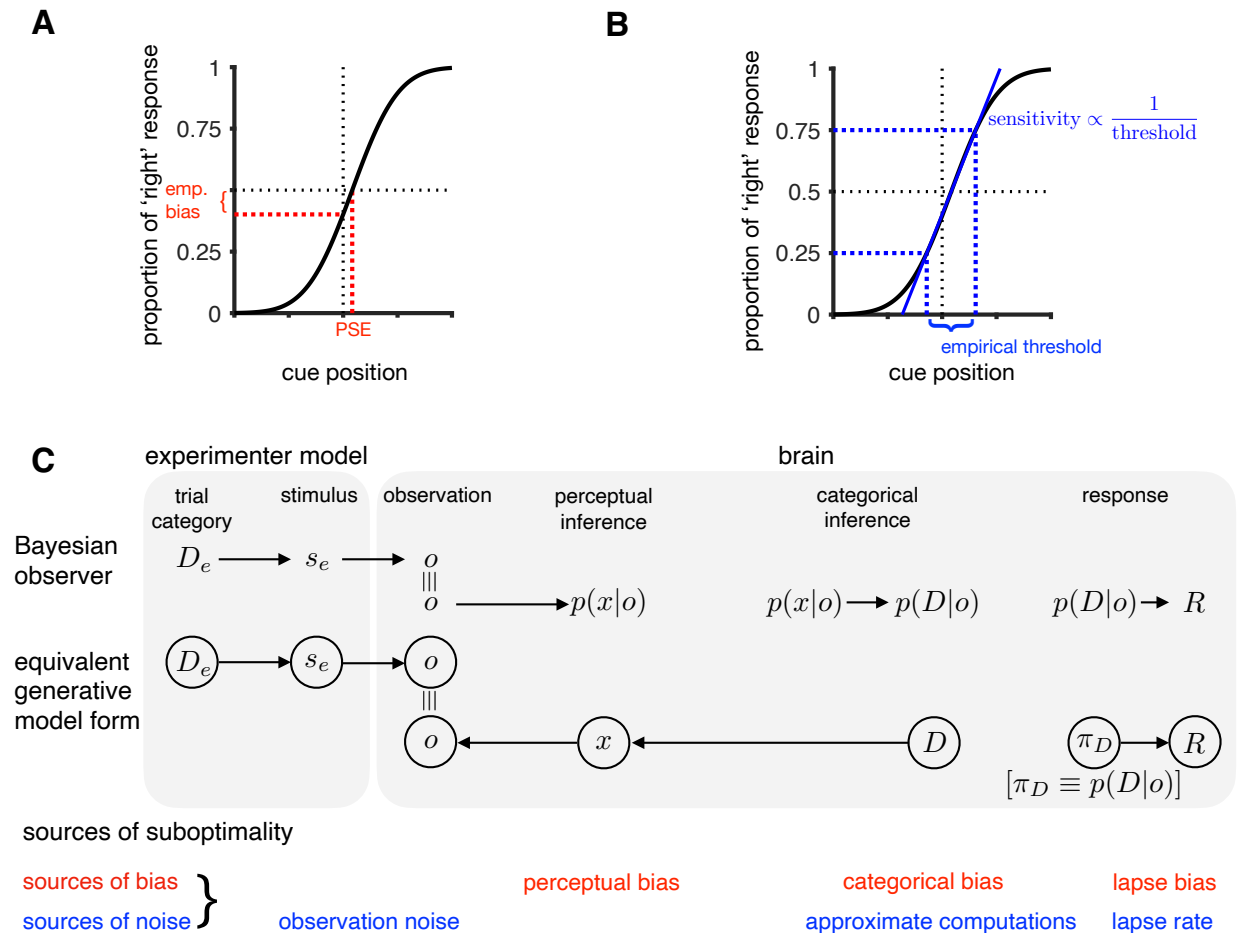

Figure 1: Modeling suboptimalities in perceptual decision making in a binary discrimination task: **(A,B)** Predicted psychometric curve for a Bayesian observer. Responses can be summarized using the empirical bias (or equivalently the point of subjective equality, i.e. PSE) as shown in A and the empirical threshold (or equivalently the slope around PSE, i.e. sensitivity) as shown in B. **(C) Top row:** Stages of perceptual decision making: In a binary discrimination task, where the goal is to discriminate which side of a reference the presented cue came from, the Bayesian observer first infers the belief about the cue position ( $x$ ). It does so by combining the likelihood of the noisy observation ( $o$ ) with its prior belief about the cue position. The noisy observation differs from the experimenter defined cue position ( $s_e$ ) due to external and internal sources of noise. The ideal observer then infers the belief about the trial category ( $D$ ) which is then converted to a response in the decision making stage where the response is chosen according to Bayesian decision theory; **Middle row:** Equivalent generative model formalization of the decision making process. **Bottom row:** Suboptimalities in the decision making process. The observer response could differ from the experimenter chosen correct trial category ( $D_E$ ) due to biases and noise/approximations associated with the different parts of each model.

76 be external or internal from the brain’s perspective. The ideal observer computes the posterior belief over  
77 the cue position and the trial category by inverting the generative model it has learned. They then convert  
78 this belief into a response that minimizes the loss/reward function of the task as formalized by Bayesian  
79 decision theory (Figure 1C, middle row) To account for deviations from the ideal observer, this model can be  
80 extended by adding potential sources of approximations and biases in the decision making process (Rahnev  
81 and Denison, 2018; Ma, 2019). Biases can arise at the perceptual, categorical and/or the response stage. The  
82 two principal forms of variability are observation noise and approximate computations (Beck et al. (2012)).  
83 Next, we briefly describe each source of suboptimality as it arises during the transformation from sensory  
84 observation to behavioral response (Figure 1C, bottom row).

85 **Observations:** Observations are inherently noisy and possibly ambiguous giving rise to observation noise.  
86 Here, we include uncertainty from both external factors and internal factors, such as noise in the sensory  
87 periphery. In many cases, the magnitude of observation noise depends on the position of the cue. Such a  
88 dependence has been extensively studied in the context of Weber’s law, Steven’s power law etc. We follow  
89 Acerbi et al. (2014) who showed that such dependencies of observation noise on position can be accounted  
90 for by defining a nonlinear mapping from the external to an internal coordinate system in which noise is  
91 additive and Gaussian. For our later data analysis, we will fit this mapping directly to data (see Methods,  
92 and Figure 2 Figure supplement 1 for an illustration of this mapping).

93 **Perceptual inference:** We assume that during perception, the brain infers beliefs about latent variables  
94  $x$ , given its sensory observations,  $o$ . The resulting belief,  $p(x|o)$ , is the product of the likelihood,  $p(o|x)$ , that  
95 characterizes the observation process and the brain’s prior expectations about  $x$ . For low-level sensory latent  
96 variables like position, this relationship of sensory latent variables to sensory observations is learned over a  
97 long time, and generally assumed to be close to optimal. We therefore model deviations from optimality in  
98 the inference process by allowing the mean (perceptual bias) and variance of the observer’s prior to differ  
99 from the (optimal) task-defined distributions. This choice is also justified by the fact that the distribution  
100 of observations usually deviate drastically between experiments and natural sensory inputs, implying a  
101 mismatch in an observer’s natural prior (obtained through lifelong learning) and the optimal prior for the  
102 task.

103 **Categorical inference:** Binary discrimination tasks introduce a binary variable,  $D$ , corresponding to the  
104 trial category that mediates the relationship between stimuli and correct responses, a relationship that we  
105 assume the observer has learned through instructions and task experience. For simplicity, and consistency  
106 with the task analyzed in the second part of this paper, we consider a simple localization task in which  
107 category  $D = 1$  corresponds to locations to the right of the midline,  $x > 0$ , and category  $D = -1$  corresponds  
108 to  $x < 0$ . However, any classification tasks in which the positions corresponding to each category i.e.  
109  $p(x|D = -1)$  and  $p(x|D = +1)$  differ (e.g. different overlapping distributions as in (Drugowitsch et al.,  
110 2016)) are equally covered by this framework.

111 Importantly, the experimenter-defined distribution over  $o$  and the observer’s perceptual prior over  $x$   
112 specify a distribution over the trial category. For instance, in the absence of a perceptual bias, and in an  
113 experiment in which  $o < 0$  and  $o > 0$  occur equally often, then the implied distribution over  $D$  is flat,  
114 i.e.  $p(D = -1) = p(D = +1) = 0.5$  (Figure 2B). On the other hand, if the observer has a negative  
115 perceptual bias, then they, over the course of the experiment, will more often perceive the category to be  
116  $-1$ , rather than  $+1$ . However, this implied distribution over the trial category may now be in conflict with  
117 the experimenter’s feedback after each trial, which will typically (by design in most experiments) imply a  
118 balance of both categories (the case we assumed here). As a result, the observer may learn an additional  
119 bias over the categories to act in such a way as to (partially) compensate for their perceptual bias. In  
120 the generative model, such a bias is formalized as a categorical prior, which may deviate from both the  
121 distribution over  $D$  implied by the sensory prior, but also from the one implied by the relative frequency of  
122 correct choices of either kind (Figure 2E). We call this additional bias ‘categorical bias’ since it leads to the  
123 observer’s perceptual inference to be non-calibrated in the sense that its expectations about the observations  
124 now deviate from the actually observed distribution. In general, perceptual and categorical bias can act  
125 independently of each other and separating them using data may be a challenge, as shown in 2.1.1.

126 **Approximate computations and behavioral responses:** Given a posterior belief over the trial cate-  
127 gory, the optimal response minimizes the expected task defined loss under the posterior. In the case of binary  
128 discrimination tasks with equal reward for either choice, this results in a strategy where it is optimal to report  
129 the trial category for which the posterior is highest (Figure 2C). The fact that inferences in the brain are  
130 approximate introduces yet another source of suboptimality. Since these approximations influence behavior  
131 by way of the categorical belief,  $\pi_D = p(D|o)$ , we model the aggregate effect of all computational approxi-  
132 mations as resulting in an approximate posterior belief over the trial category. Inspired by sampling-based  
133 models of perception and cognition (Fiser et al. 2010), we chose to quantify the degree of approximation  
134 as the number of samples the brain uses to approximate the posterior. The approximation becomes more  
135 accurate as the number of samples increases, with infinitely many samples being equivalent to exact infer-  
136 ence. The observer chooses the response corresponding to the belief for which most samples were generated.  
137 For the case of a single sample, this results in probability matching, while larger numbers of samples can  
138 be equivalently interpreted as a softmax response strategy with a temperature parameter that is inversely  
139 related to the number of samples (Drugowitsch et al., 2016). We emphasize that this parameterization of  
140 the degree of approximation does not commit our model to a neural sampling-based implementation but is  
141 simply an intuitive and general way to quantify computational precision.

142 Finally, we note that we also account for lapses (which are outside our Bayesian observer model frame-  
143 work) in order to model real data. We model lapses as occurring independently of the decision making  
144 process as shown in the generative model in Figure 1C. The lapse parameters in our model encapsulate  
145 any influences on the decision not yet captured, like choice error, loss of attention etc. Any motor-related  
146 response biases are also encapsulated in the lapse parameters that we fit for each observer (for details see  
147 Methods).

### 148 2.1.1 Non-identifiability of different sources of suboptimality using observer responses in a 149 binary discrimination task

150 Having defined different sources of suboptimality raises the question of whether they can actually be in-  
151 dependently constrained using empirical data. It turns out that data from a simple binary discrimination  
152 task cannot distinguish between (a) perceptual bias and categorical bias and (b) degree of approximation  
153 (number of samples) and observation noise. This is because these four quantities combine to determine the  
154 empirically measured bias and sensitivity in a way that can not be disentangled. We have shown (Methods)  
155 that even with the extra suboptimality parameters, the observer response is given by the classic family of  
156 psychometric curves

$$p(R|s_e) = \lambda_r \lambda_b + (1 - \lambda_r) \Phi \left[ \frac{m(s_e) - \text{empirical bias}}{\text{empirical sensitivity}^{-1}} \right] \quad (1)$$

157 where  $\lambda_r$  is the lapse rate,  $\lambda_b$  is the lapse bias,  $\Phi$  is the cumulative Gaussian distribution function, and  $m(s_e)$   
158 maps the external cue location onto internal coordinates to account for non-additive noise. Importantly, the  
159 empirical bias is a function of the perceptual bias, the categorical bias, the observation noise, and the prior  
160 variance. The empirical sensitivity is a function of the observation noise, the accuracy of the computational  
161 approximations, and the prior variance (see Methods for full analytical relationships).

162 **Sources of bias:** The empirical bias implied by the observer responses is the result of the priors in the  
163 *observer's* generative model of the task differing from those used by the *experimenter*. The *ideal* observer's  
164 priors over the cue position and the category match those of the experimenter. The prior over cue position  
165 is typically centered on zero and the prior over the category is typically 50-50 as illustrated in Figure 2A  
166 and 2B. When an observer has a biased perceptual prior (Figure 2D), this implies a categorical prior that  
167 differs from 50-50 (orange shading in Figure 2D and 2E). Furthermore, the observer's categorical prior may  
168 be different from that implied by the perceptual prior, resulting in a categorical *bias* (Figure 2E indicated  
169 by the red shading). The categorical bias also scales the perceptual prior to reflect the different categorical  
170 prior than that implied by the perceptual prior (Figure 2D). An observer's perceptual and categorical priors  
171 together determine its empirical bias. Equation (1) demonstrates that the two biases are indistinguishable  
172 given a single measured psychometric function. This is also illustrated by the iso-contours in Figure 2I where  
173 an observed empirical bias (Figure 2G) can arise from infinite combinations of perceptual and categorical  
174 biases.

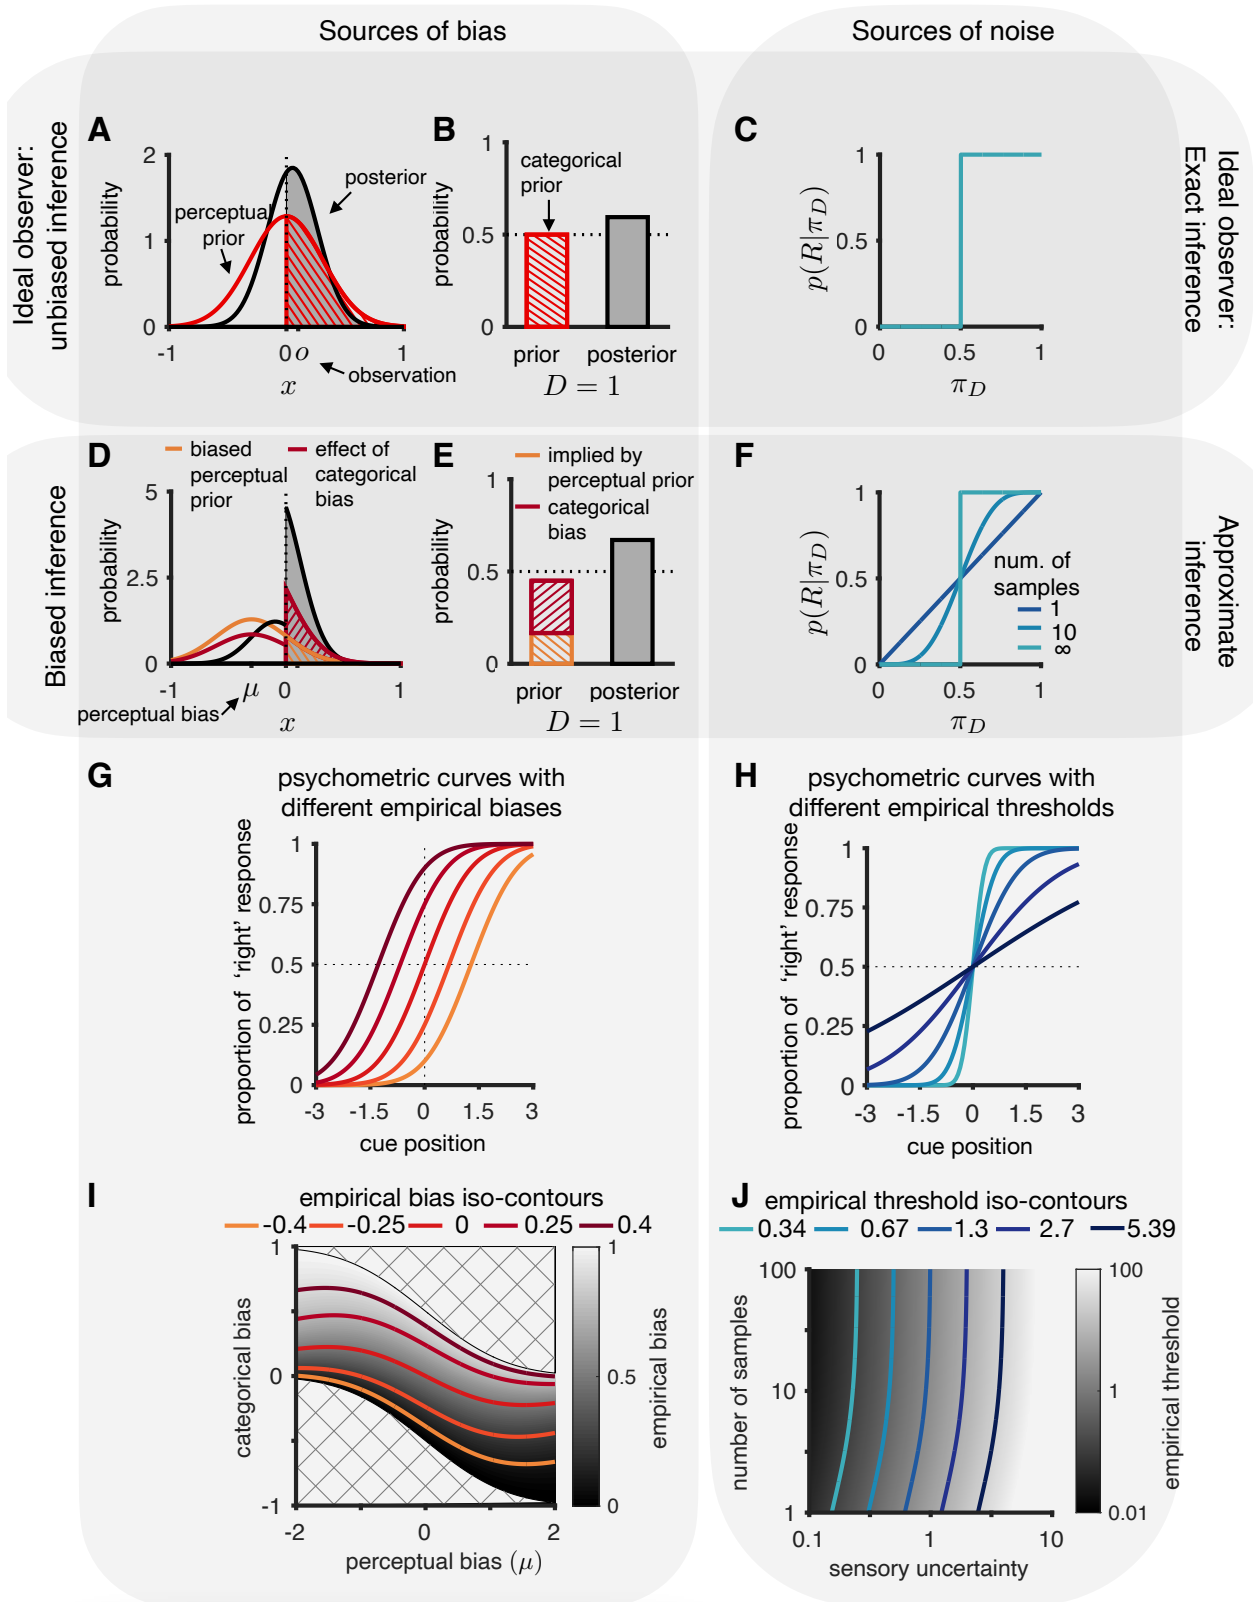

Figure 2: **(A-C)** Ideal observer for canonical task: zero mean prior that corresponds to the experimenter’s prior **(A)**, and 50-50 categorical prior **(B)** which we assume to be the correct one for the modeled experiment. The response is chosen that corresponds to the category with the highest posterior belief **(C)**. **(D-E)** Biased observer: a perceptual bias can be modeled as a prior whose mean is shifted away from zero **(D, orange)**. A categorical bias manifests itself in a prior over the category  $D$  that differs from the distribution implied by the perceptual prior and the distribution over observations **(E, red)**. **(F)** We model approximate computations by basing the response,  $R$ , on a finite number of samples drawn from the exact posterior,  $\pi_D$ . One sample results in probability matching, and  $\infty$  samples correspond to exact inference. **(G,I)** Any empirical bias can arise from different combinations of calibration and perceptual biases as illustrated by iso-contour lines in **(I)** for different empirical biases (corresponding psychometric curves shown in **G**). Hatched region indicates impossible combinations of perceptual and categorical bias. **(H,J)** As in **(G,I)** the observed empirical threshold can arise from different combinations of number of samples and observation noise as illustrated by iso-contour lines in **J** for different empirical log thresholds (corresponding psychometric curves shown in **H**)

175 **Sources of noise:** The observed empirical threshold depends on observation noise and the degree of  
176 computational approximation in the inference process. The ideal observer performs exact inference using the  
177 exact posterior probability over trial categories to choose the response that is most probable as illustrated in  
178 Figure 2C. Real observers, however, are necessarily approximate. We quantify the degree of approximation  
179 by the equivalent number of samples (infinite corresponding to exact inference, and one sample corresponding  
180 to probability matching). This results in a different response strategy as a function of the number of samples  
181 (Figure 2F). The observation noise and the number of samples together determine the empirical threshold.  
182 Equation (1) indicates that the two are indistinguishable given a single measured psychometric function.  
183 This is illustrated by the iso-contours in Figure 2J where an observed empirical threshold (Figure 2H) can  
184 arise from different combinations of observation noise and number of samples.

## 185 **2.2 Choice irrelevant cues in a multi-sensory causal inference task can be used** 186 **to dissociate different sources of suboptimality**

187 We recently presented a task for which we demonstrated the ideal observer has a qualitatively different  
188 behavior than an approximate observer, regardless of their observation (sensory) noise (Cappelloni et al.,  
189 2019). This means that, in principle, it should be possible to use data from this task to infer sensory noise  
190 and degree of approximation separately. We will also show that, for this task, sensory prior and calibration  
191 prior have different effects on psychometric curves, implying that these two sources of suboptimality could,  
192 in principle, be dissociated using the empirical data.

193 First, we briefly summarize the task from Cappelloni et al. (2019): Two brief (300 ms) auditory stimuli,  
194 a tone and noise, were presented at equal eccentricity on opposite sides of the midline (Figure 3A). The  
195 observer was asked to report on which side of the midline the tone appeared. Temporally paired with the  
196 auditory stimuli, two random visual shapes were presented on the screen at different positions depending  
197 on the condition. In the first “central” condition, the visual shapes were presented on the midline, at the  
198 center of the screen. In the “matched” condition, the two visual shapes were presented at the same locations  
199 as the two auditory signals, tone and noise. Importantly, the appearance of the visual cues were random  
200 and not paired in any way with tone and noise and hence contained no information about the correct choice  
201 (left/right) in both conditions. In the matched condition, however, the visual cues did contribute information  
202 about the location of the auditory stimuli. The ideal observer in this task performs inference over whether  
203 they are in the central or matched condition: in the central condition, the visual cues should be ignored  
204 and in the matched condition, the observed locations of the visual cues should be cue-combined with the  
205 locations of the auditory cues. This process can be formalized as “causal inference” (Körding et al., 2007;  
206 Shams and Beierholm, 2010) and is shown as a graphical model in Figure 3B where the variable  $C$  represents  
207 the *condition* from the experimenter’s perspective, or the *causal structure* from the brain’s perspective and  
208 determines whether auditory and visual signals are combined (for equations see Methods).

209 Importantly, an ideal observer, i.e. without any biases and performing exact inference, has the same  
210 psychometric functions in both the central and matched conditions. This is in line with expectations based  
211 on the fact that the visual cues by themselves contain no information about the correct choice. However, it

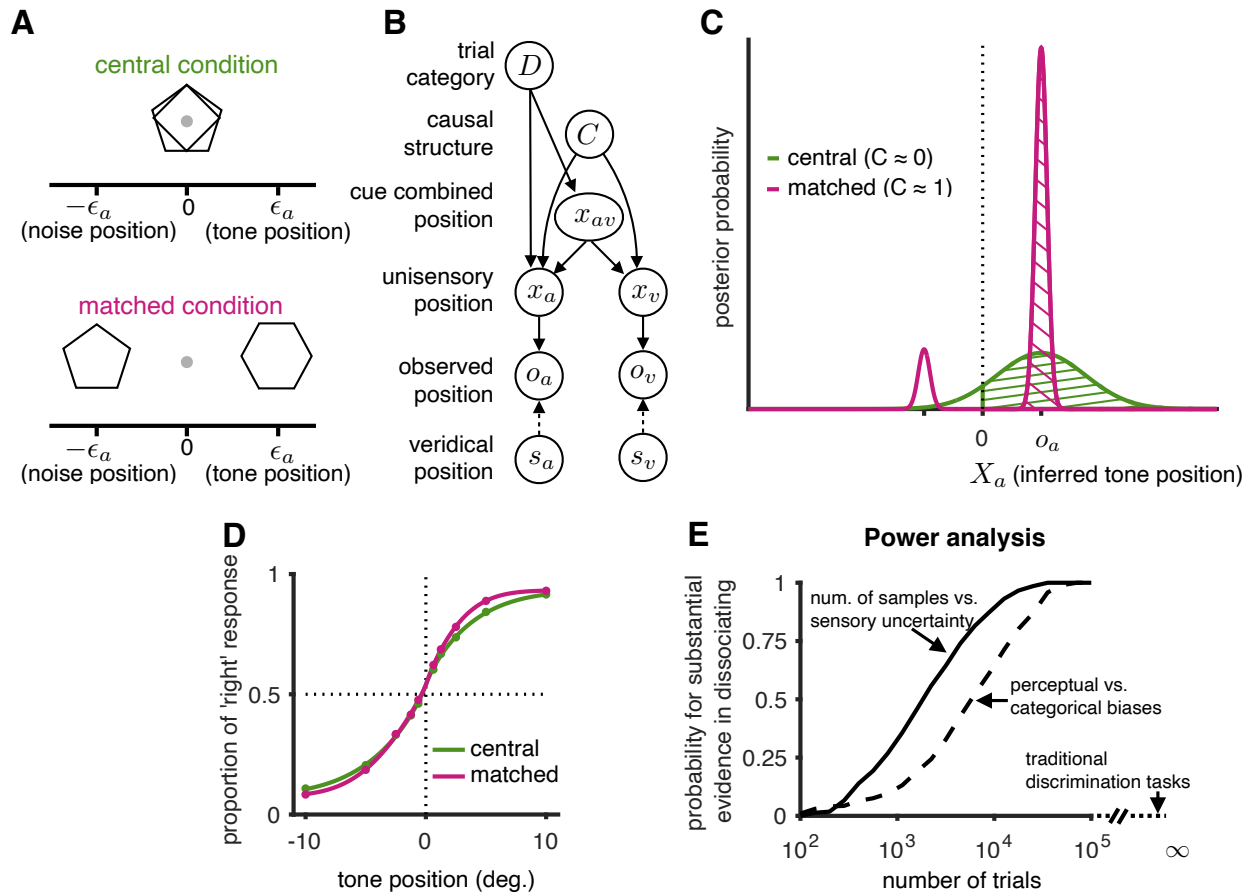

Figure 3: Task paradigm involving choice uninformative cues allowing for a dissociation of different sources of suboptimality. **(A)** On every trial, the observer observes four cues: a tone and a noise which are equidistant from the midline but on opposite sides and two visual cues (shapes) that are either overlapping at the midline in the central condition or aligned with the tone and noise in the matched condition. The pairing of shape and sound are random, making the visual cues uninformative about the correct choice. **(B)** Generative model for this task. The observer performs causal inference (Körding et al., 2007) to determine whether or not sounds and visual cues have the same eccentricity, and whether to combine information across them. **(C)** Illustration of how the visual cues affect the belief over the trial category. In the absence of visual cues, the belief over the trial category is the area of the likelihood function to the right of midline (assuming a flat prior over the inferred tone position and no biases). Assuming that the visual cues have a lower observation noise than the auditory cues, visual cues that are aligned (matched condition) will result in a bimodal likelihood function at the two cue positions. Since the larger of the two modes will always be on the same side as the mode of the auditory likelihood, the ideal observer will choose the same response in both conditions. However, since the left/right distribution of probability mass changes, an approximate observer (e.g. probability matching) may produce different responses in the two conditions **(D)** Predicted psychometric curves from an approximate Bayesian observer using realistic parameters (see fits to data below). **(E)** Power analysis that shows the probability of getting substantial evidence (measured using Bayes factor) in favor of two suboptimality extensions to the ideal observer model: approximate computations vs exact inference (solid line), categorical bias vs a perceptual bias (dashed line). Traditional binary discrimination task provide zero evidence in favor of both extensions. A similar plot using AIC for model comparison is shown in Figure 3 Figure supplement 1.



212 turns out that the psychometric functions for each condition differ for an approximate observer in this task.  
213 Empirically the observer performance was also affected between central and matched conditions. Figure  
214 3C recapitulates the visual proof (Cappelloni et al., 2019). In brief, in the central condition, when the  
215 auditory cues are not combined with the visual cues, the posterior may be a wide Gaussian centered on  
216 the observation. The ideal observer will report the side with the higher probability mass. However, in the  
217 condition in which the visual cues are matched to the auditory cues in eccentricity, the resulting posterior  
218 will be more highly localized around the eccentricities given by the visual cues. Importantly, while the side  
219 on which the probability mass is higher does not change leading an ideal observer to make the same decision  
220 in both conditions, the relative probability mass changes between conditions. As a result, the behavior of  
221 an approximate observer will be different since their ‘confusion probability’ will depend on the *relative* mass  
222 on both side. Note that the amount by which the approximate observer’s curves differ between the two  
223 conditions decreases with increasing approximation quality (parameterized by smaller number of samples in  
224 our case).

225 We performed a power analysis for the probability of finding substantial evidence in favor of approximate  
226 computations, where we defined ‘substantial’ as a Bayes factor greater than  $\sqrt{10}$  (Kass and Raftery, 1995)  
227 when compared against the exact inference model (Figure 3E). We simulated data from the causal inference  
228 model by choosing the sensory parameters as the average fit parameters across 20 observers for a particular  
229 value of number of samples and categorical bias (psychometric curve shown in Figure 3D). Given the number  
230 of trials available in our dataset (8000 trials across all participants), we had more power to constrain the  
231 computational approximation parameter independent of the sensory noise as compared to independently  
232 constraining sensory and categorical bias. We note that our estimate of the power is a conservative under-  
233 estimate since the bias of the average observer considered here is smaller than that of the typical observer  
234 (since biases average out, unlike the computational approximation). We also performed the same power  
235 analyses using AIC instead of Bayes factor and obtained very similar results (see Figure 3 Figure supplement  
236 1).

237 We next investigated the empirical signatures of the key suboptimalities in our model (Figure 4A).  
238 Traditional observation noise and perceptual bias, in the absence of computational approximations or a  
239 categorical bias, produce traditional sigmoidal psychometric curves that are identical for matched and central  
240 condition (Figure 4A “perceptual bias”). However, as soon as either the computations are approximate  
241 (Figure 4A “approximate inference), or the observer has a categorical bias (Figure 4A, “categorical bias”),  
242 the psychometric curves for central and matched condition deviate in characteristic ways. Despite the fact  
243 that the visual cues do not contain any information about the correct choice, an approximate observer’s  
244 performance improves substantially in the matched condition for intermediate eccentricities where the visual  
245 cues increase the certainty over the inferred category. A categorical bias, on the other hand, has an even  
246 more idiosyncratic effect on behavior. When it is “compensatory” to the perceptual bias, it reduces the  
247 overall bias as expected. However, it does so not by a simple shift in the psychometric function, but in a  
248 way that preserves the perceptual bias when the cue is at the discrimination boundary (zero), leading to a  
249 two-lobed adjustment to the psychometric curve (Figure 4A, “compensatory biases”). In our data, we find  
250 evidence for all these signatures of the different suboptimalities. Data from four example observers together  
251 with their model fits are shown in Figure 4B. We note that these signatures directly arise from the canonical  
252 extensions to the generative model, and were not the result of trying to post-hoc fit the data. In fact, it  
253 is hard to imagine an extension of a phenomenological model involving sigmoidal psychometric curves, e.g.  
254 by allowing for different slopes of biases across conditions, that would produce the predicted, and observed,  
255 behavior. (Also, see methods for a mathematical characterizations of these signatures.)

### 256 **2.3 Analysis of behavioral data in choice-uninformative cue task**

257 We next fit our approximate Bayesian observer model (Figure 3B) to the responses for each of the 20 individ-  
258 ual observers in our data set (Cappelloni et al., 2019). We obtain full posteriors over all model parameters  
259 under weakly informative priors for each of the 20 observers (see Methods for fitting details). The key pa-  
260 rameters of interest are the number of samples that quantify the degree of approximation and the categorical  
261 bias. Categorical bias represents the choice prior’s deviation from what is implied by the perceptual bias.  
262 The number of samples lies between one (coarsest approximation) and  $\infty$  (exact inference). Since drawing  
263 100 samples is indistinguishable from exact inference in our case, we only consider the range from 1 to 100,

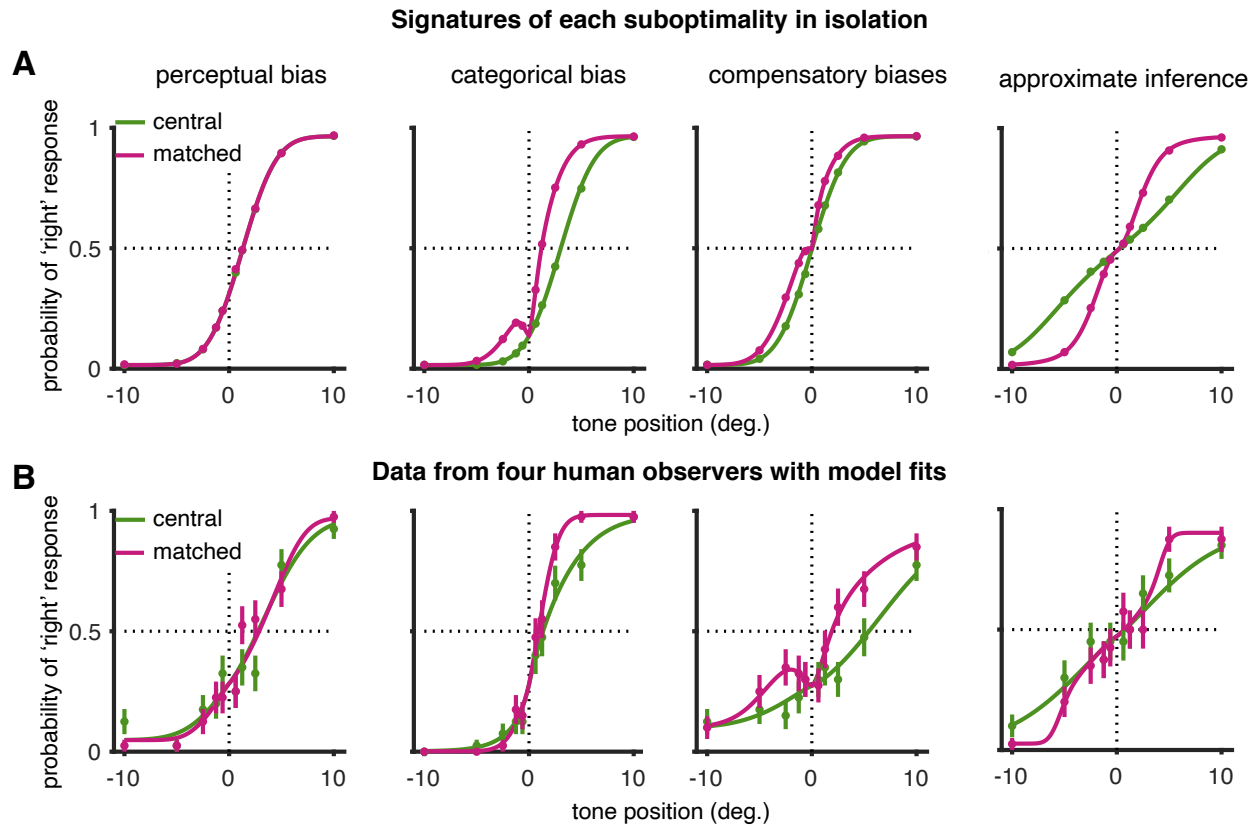

Figure 4: Empirical signatures of each suboptimality included in the model, and data from example observers. **(A)** Model predictions from left to right: (a) perceptual bias with no categorical bias and exact inference (b) categorical bias with no perceptual bias and exact inference (c) both perceptual and categorical biases such that the categorical bias is 'perfectly' compensatory, i.e. the empirically bias under this combination of perceptual and categorical biases is 0; exact inference (d) approximate inference with no bias. **(B)** Data from example observers responses and model fits: (a) perceptual bias with small categorical bias (b) categorical bias with small perceptual bias (c) both perceptual and categorical biases such that the categorical bias is compensatory, exact inference (d) approximate inference with no bias.

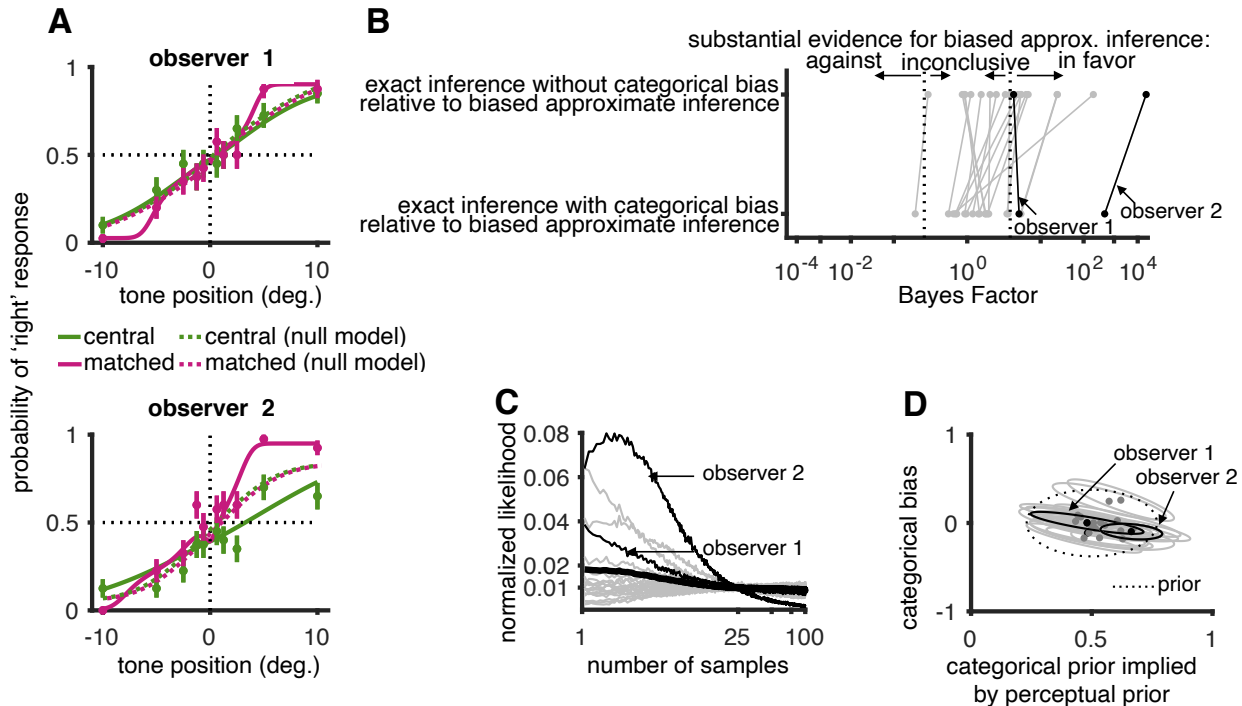

Figure 5: Model fitting and model comparison: **(A)** Responses from two example observers along with approximate Bayesian observer fits. Errorbars indicate 1 s.e.m. The dotted lines show the best fit ideal observer (unbiased and exact). **(B)** Model comparison between the approximate inference model and two alternate models: (i) exact inference model without categorical bias and (ii) exact inference with categorical bias. Positive Bayes factors indicate evidence in favor of the approximate inference model and values greater than  $\sqrt{10}$  indicate substantial support for the approximate inference model. **(C)** Likelihood function showing likelihood of the data for different values of number of samples marginalizing out the other parameters. Thin graylines represents individual observers with the thin black lines indicating the example observers in A. The thick line represents average across observers. **(D)** Posterior distribution over the categorical bias for each observer indicated by thin gray lines with black lines indicating example observers in A.

264 in addition to exact computations. We will compare the following three models: (a) exact inference without  
 265 a categorical bias (but with a perceptual bias), (b) exact inference with perceptual and categorical bias,  
 266 and (c) approximate inference with both kinds of biases and a finite number of samples characterizing the  
 267 approximate computations. Approximate computations are the main focus for the remainder of the Results  
 268 section.

269 Responses of two example observers were chosen to examine the model predictions more closely as shown  
 270 in Figure 5A. Observer 1 was close to unbiased with approximate computations. Observer 2 suffered from  
 271 both a perceptual and categorical bias and was also best explained assuming approximate computations.  
 272 Data from both observers deviate from the assumption of exact inference (Figure 5A, dotted lines correspond  
 273 to the null model, i.e. unbiased exact inference). All models explained the variance in the data reasonably  
 274 well. There was a modest improvement for the model including suboptimalities, even when accounting for  
 275 the increase in number of parameters (Figure 5 Figure supplement 1). We also performed a Bayesian model  
 276 comparison using Bayes Factors (BF) to quantify how much one model is favored by the data compared to  
 277 another model (Figure 5B). All our comparisons compare the full approximate inference model to its simpler  
 278 alternatives, with BF's larger than 1 indicating evidence in favor of the approximate model, and greater than  
 279  $\sqrt{10}$  indicating substantial evidence in favor of the approximate inference model (Kass and Raftery, 1995).  
 280 The data provides substantial support in favor of the approximate inference model over the exact inference  
 281 model without categorical bias for ten of 20 observers and in favor of the approximate inference model over  
 282 the exact inference model with categorical bias for 4 observers. Data from three of 20 observers provide

283 strong evidence ( $BF > 10$ ) for the approximate inference model as compared to the null model (unbiased  
284 exact inference).

285 The degree of approximation that best describes the data is shown individually for each observer in  
286 Figure 5C. Interestingly, for most observers, both extremes (one sample and 100 samples) are favored by  
287 the data, suggesting that there is a wide range of degrees of approximations underlying the task-relevant  
288 computations for the observers in our population. However, care must be taken to avoid over-interpreting  
289 the individual observer posteriors as they are wide due to the limited data per observer.

290 Figure 5D shows the joint posteriors over perceptual bias and categorical bias for individual observers.  
291 As expected from our power analysis (Figure 3E), for most observers there is little information constraining  
292 biases from the limited amount of data that we have for each observer. However, for a few observers (e.g.  
293 observer 2) the posteriors are markedly different from the prior clearly constraining both types of biases.

### 294 **2.3.1 Aggregate observer analysis**

295 In order to pool statistical power across observers, we also perform our analysis on an aggregate observer  
296 whose responses are the combined responses across observers. The way we construct the aggregate observer  
297 from our data is equivalent to fitting a hierarchical model across observers allowing for variability across  
298 observers in all parameters except categorical bias and number of samples. Therefore the estimated categor-  
299 ical bias and number of samples are the average values across the population. We construct this aggregate  
300 observer by aligning the data from each individual observer in such a way as to account for their individ-  
301 ual lapses, perceptual bias – all parameters except for number of samples and categorical bias (for details  
302 see Methods). If each observer performed exact inference and had no categorical bias, the transformed  
303 psychometric functions from all observers would be identical.

304 The aggregate observer data are shown in Figure 6A where the top panel shows the average psychometric  
305 curves for the central and matched conditions whereas the bottom row shows the average difference. The  
306 bottom panel is based on a paired comparison (difference) of matched and central condition per observer  
307 and clearly shows the hallmark of approximate inference in our task: enhanced performance for intermediate  
308 eccentricities, but little change for zero and large eccentricities. Our analysis of this aggregate observer  
309 strengthens the conclusion from the analysis of the individual observer data: the data decisively favors the  
310 approximate inference model (Figure 6C). The degree of approximation that best fits the data is based on a  
311 single sample, i.e. a coarse approximation. Its bias is not well-constrained by the data (Figure 6D). Finally,  
312 the full model accounts for marginally more variance in the data after accounting for the increase in number  
313 of parameters (Figure 5 Figure supplement 1).

## 314 **2.4 Effect of stimulus duration on degree of approximation and sensory noise**

315 Most theories of approximate inference (whether parameteric or sampling-based) predict that computations  
316 become more exact over time (Fiser et al., 2010; Pouget et al., 2013; Ma, 2019). However, testing whether  
317 this prediction holds in the case of the brain is complicated by the fact that observation noise is also likely  
318 to decrease with stimulus duration (Lengyel et al., 2015). Since our task allows us to dissociate the two  
319 of them, we repeated the experiment for different durations of the stimulus (Cappelloni et al., 2020). A  
320 change in sensory noise will manifest itself in a change in the overall slope of the psychometric functions. A  
321 change in computational accuracy affects both slope and the difference between the matched and the central  
322 conditions in a way that interacts with the observer’s biases.

323 Figure 7A shows the data from an example observer, showing a change in the difference between matched  
324 and central condition for increasing stimulus durations (top: 100 ms, middle: 300 ms, and bottom: 1000 ms).  
325 As expected, the overall slope of the psychometric functions increases with stimulus duration, compatible  
326 with a decrease in sensory observation noise. Additionally, the difference between the central and the matched  
327 conditions clearly decreases between 100 ms and 300 ms. While the change from 300 ms to 1000 ms is less  
328 obvious, model fitting confirms that the data for 300 ms favor a coarser approximation than the data for  
329 1000 ms (Figure 7D).

330 We perform Bayesian model comparison using Bayes Factors as before, now comparing the full approxi-  
331 mate inference model with a degree of approximation (number of samples) that depends on stimulus duration,  
332 to two simpler models: first, (a) an approximate inference model with a fixed degree of approximation across

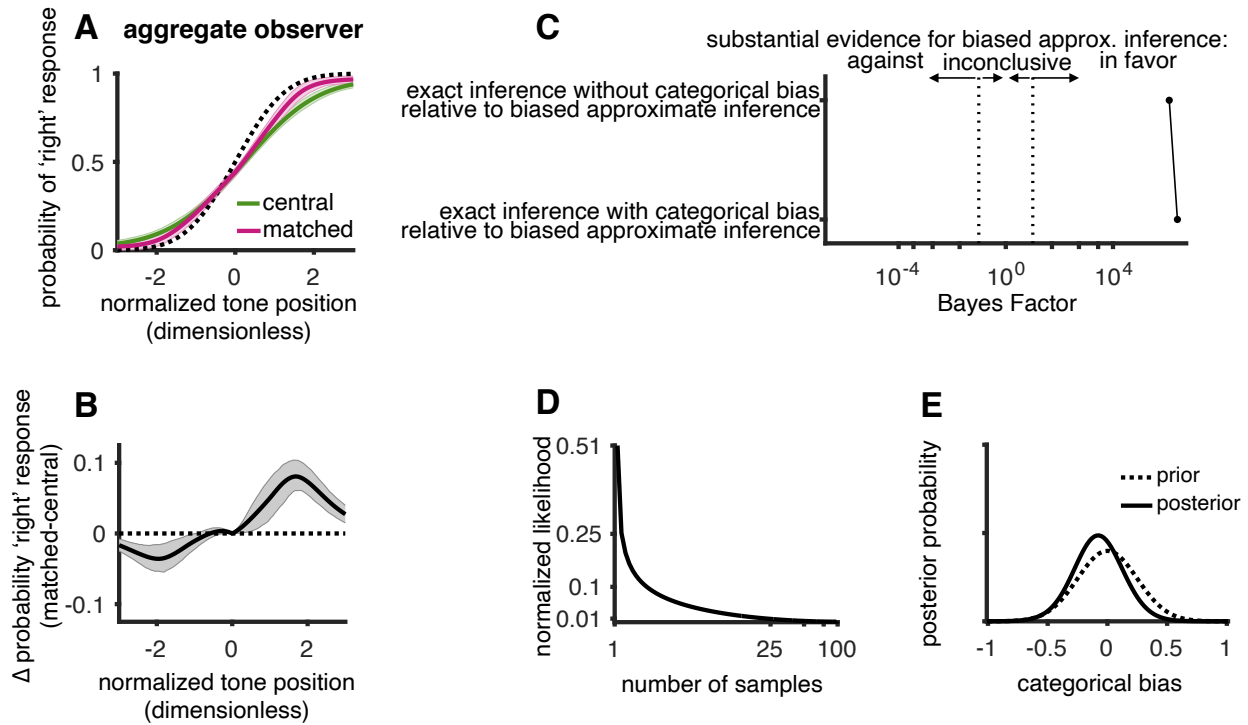

Figure 6: Model comparison for aggregate observer. **(A)** Model fits to aggregate observer data. Shading represents 1 s.e.m uncertainty intervals of posterior predictive distribution. The aggregate observer is constructed by combining normalized data from all individual observers after correcting for individual perceptual biases, observation noises and lapse parameters. The dotted line shows the fit ideal observer. **(B)** Mean difference between the probability of “right” responses between matched and central conditions. The dotted line shows the ideal observer prediction. Shading represents 1 s.e.m confidence intervals. **(C)** Model comparison (as in Figure 5C) shows overwhelming support for the approximate inference model over exact computations. **(D)** Likelihood of number of samples as in Figure 5D clearly favoring small number of samples. **(E)** The slight shift in the posterior over categorical bias for the aggregate observer provides weak evidence for a categorical bias on the population level.

333 all stimulus durations, and second, (b) an exact inference model (Figure 7B). Each of these three models  
334 includes for both perceptual and categorical biases. All models explained the variance in the data reasonably  
335 well (Figure 5 Figure supplement 1). We find that the data for eight of 20 observers provides substantial  
336 evidence in favor of approximate inference over exact inference, and for six of twenty observers in favor of a  
337 degree of approximation that changes with stimulus duration (Figure 7B).

338 Furthermore, and independent of our finding of the change in degree of approximation, we find that  
339 observation noise decreases as duration increases across the entire range of stimulus durations up to 1000ms  
340 (Figure 7C). As before, we find that the data from individual observers tends to favor either low or high  
341 numbers of samples, with a weak trend favoring higher numbers of samples for longer stimulus durations  
342 (Figure 7D). However, we clearly do not have enough data to draw reliable conclusions for most observers.

343 In order to again increase statistical power, we pool the data to form an aggregate observer (Methods).  
344 For all stimulus durations we find the pattern in the aggregate data that is characteristic of approximate  
345 inference (Figure 8A). Furthermore, we find that on the population level the data contains substantial  
346 evidence for an approximate inference model whose degree of accuracy changes with stimulus duration over  
347 an exact inference model and one whose degree of approximation is independent of duration (Figure 8B).  
348 Importantly, and in line with our initial hypothesis, we find that the data implies a systematic change from  
349 coarser to finer approximate computations as duration increases (Figure 8C).

### 350 **3 Discussion**

351 Our work makes several conceptual and empirical contributions. First, we have extended the classic ideal  
352 observer model by four key sources of potential suboptimality in the context of the *generative* model, inde-  
353 pendent of how the inference process is implemented algorithmically. We showed that data from a simple  
354 discrimination task cannot dissociate the two sources of bias in our model, nor the two sources of variability  
355 (noise). Second, we showed that a more complex task involving causal inference containing choice irrelevant  
356 cues that affect the performance of suboptimal observers differently from ideal observers can dissociate be-  
357 tween all these sources of suboptimality. Third, we used psychophysical data from that task to infer the  
358 sources of suboptimality for each observer. We found clear evidence for approximate computations, separate  
359 from observation noise, in both individual observers and on the population level. Finally, we found that  
360 both observation noise, and the accuracy of the approximate computations, improved with the duration of  
361 the presented stimulus across the entire range of tested stimulus durations: from 100 ms to 1000 ms.

362 Our Bayesian observer framework formalizes the prescription in (Rahnev and Denison, 2018) to construct  
363 observer models that quantitatively characterize the different sources of suboptimality in perceptual decision  
364 making. There are two principal ways in which suboptimality parameters can be added in a Bayesian frame-  
365 work: either by adding parameters to the components of the *generative* model (e.g. priors and likelihoods),  
366 or the components of the *discriminative* model (e.g. criteria or inference noise). Our work follows the  
367 generative approach, in line with the idea that the brain learns a generative model of its inputs (“analysis  
368 by synthesis” Yuille and Kersten (2006); Lee and Mumford (2003)). Further it is related to earlier work  
369 quantifying deviations from optimality in a task by allowing for priors that were different from those defined  
370 by the experimenter (Stocker and Simoncelli, 2006; Odegaard et al., 2015; Noel et al., 2021). However, our  
371 approach differs from prior work that followed the discriminate model approach and added suboptimality  
372 parameters to the discriminative ideal observer model (e.g. Brunton et al., 2013; Drugowitsch et al., 2016)).  
373 An important test for both generative and discriminative approaches will be how well the suboptimalities  
374 inferred in either framework will generalize to other tasks or contexts. As a practical concern we note that  
375 beyond extremely simple stimuli and tasks, the exact discriminative model quickly becomes complex and  
376 intractable, limiting the feasibility of the discriminative approach for natural or complex stimuli and tasks.

377 Taking a generative approach allows one to define the perceptual bias and the categorical bias in a way  
378 that directly relates to discrepancies between the statistics of natural inputs and those in a given task. Task  
379 statistics are rarely similar to natural statistics and earlier studies have indeed found that biased responses  
380 could be explained as a result of observers using their natural perceptual priors instead of those implied by  
381 a given experiment (Stocker and Simoncelli (2006); Odegaard et al. (2015)). How the brain resolves this  
382 conflict between priors learned outside and inside the context of a specific task might provide insights into the  
383 brain’s learning and compensation strategy among neurotypical and patient populations (see e.g. Noel et al.

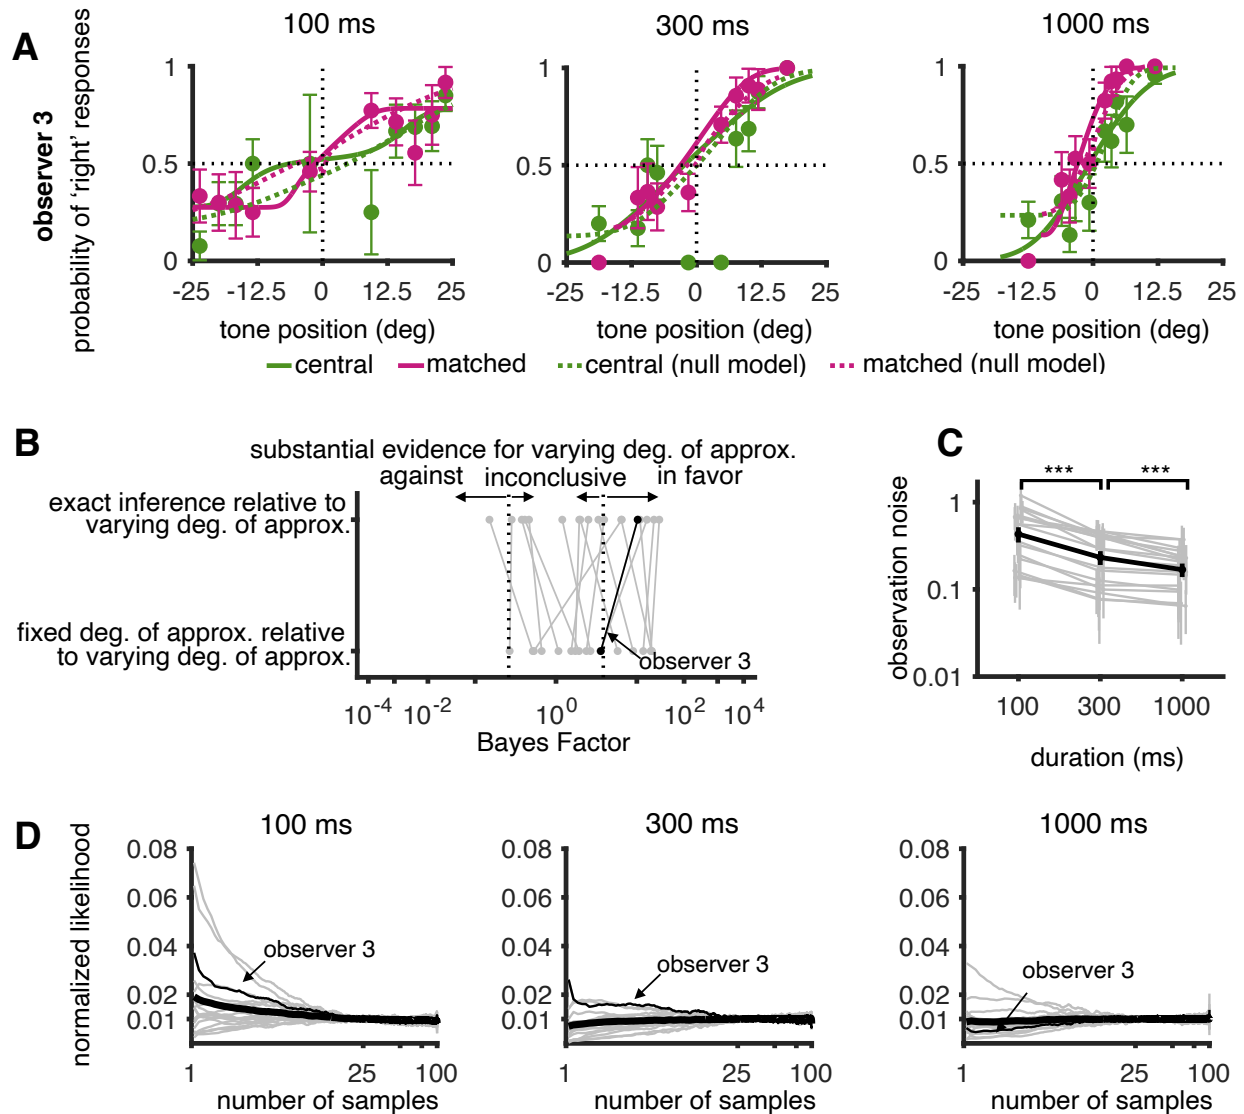

Figure 7: Individual observer analysis of variable duration task data: **(A)** Example observer psychometric curves (1 s.e.m. errorbars). Solid lines represent fits of approximate inference model whose degree of approximation varies with duration. Dotted lines represent exact inference model fits. **(B)** Model comparison of the approximate inference model with varying degree of approximation with two alternate models: exact inference model and approximate inference model with fixed degree of approximation. All models include perceptual and categorical biases. Positive Bayes factors indicate evidence in favor of the approximate inference model with varying degree of approximation with duration. **(C)** Observation noise as a function of duration for individual observers (thin gray lines) and population average (thick black line). Statistical significance assessed by a right tailed paired t-test ( $p = 2.5 \times 10^{-5}$  for change from 100 ms to 300 ms and  $p = 2.8 \times 10^{-4}$  for difference between 300 ms and 1000 ms). Significance is consistent under a non-parametric sign test. **(D)** Likelihood function for number of samples marginalizing out the other parameters for each duration. Individual observers (thin lines) and population average (thick line).

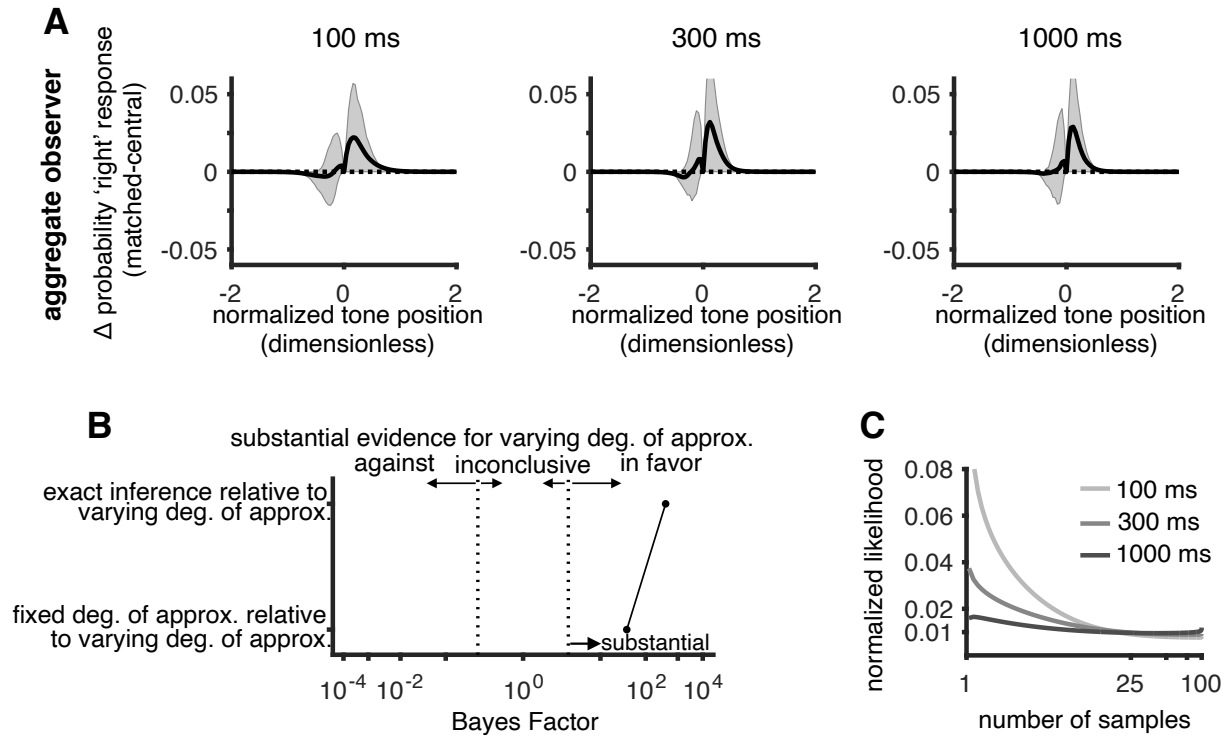

Figure 8: Aggregate observer analysis of variable duration task data: **(A)** Mean difference between probability of “right” responses in matched and central conditions (with 1 s.e.m. errorbars) where the aggregate observer is constructed analogously to Figure 6. The dotted line shows the prediction of the ideal observer (exact inference without categorical bias). **(B)** Model comparison between approximate inference model with varying degree of approximation and (i) exact inference and (ii) fixed degree of approximation. The aggregate data provides strong evidence that the degree of approximations depends on stimulus duration. **(C)** Likelihood functions for the number of samples. Change in shape reflects changing evidence for a coarse approximation for the shortest duration, to a better approximation for longer durations.



384 (2021)). By formulating decision priors as parameters in the generative model, we provide a systematic way  
385 of characterizing any deviation between decision and perceptual priors as categorical biases in the model,  
386 likely relevant for a wide range of studies into human decision-making.

387 Perceptual biases in decision making could also arise in the likelihood as opposed to the prior (Stocker  
388 and Simoncelli, 2005). While our formalization can easily be extended to allow for this additional source  
389 of suboptimality, under Gaussian assumptions for likelihood and prior, the biases in the likelihood and the  
390 prior are mathematically equivalent. Therefore, having an additional bias term in the likelihood would not  
391 change the explanatory power of the model in the context of our dataset.

392 We analytically showed the non-identifiability of the different sources of suboptimality. This was noticed  
393 earlier (Acuna et al., 2015; Linares et al., 2019; Wyart and Koechlin, 2016; Drugowitsch et al., 2016),  
394 leading to efforts to break them by using a more sophisticated task design. For example, Acuna et al.  
395 combined the results from an estimation task with those of a categorization task to dissociate sensory noise  
396 from approximate inference and did not find evidence of the latter. Drugowitsch et al. used an evidence  
397 integration task in which they varied the number of to-be-integrated stimulus frames in order to dissociate  
398 sensory from computational noise, finding that computational noise was an important source of behavioral  
399 suboptimality. Linares et al. combined data from two discrimination tasks with two different discrimination  
400 boundaries to dissociate between perceptual and categorical priors but did not distinguish between sensory  
401 noise and computational approximations. The data analyzed in our work has the advantage of being based on  
402 a single task (auditory discrimination with respect to the midline) with two randomly interleaved conditions  
403 (central and matched) of equal duration. This minimized changes between different tasks (e.g. estimation  
404 vs discrimination) potentially relying on different representations and decision strategies.

405 Our task design allows us to directly estimate the importance of observation noise and of approximate  
406 inference as a function of time. Traditionally, longer stimulus durations are thought to trigger an evidence  
407 integration process during which the brain averages away noise (Gold and Shadlen, 2007; Stine et al., 2020)  
408 explaining the observed improvement in behavioral performance. However, most approximate inference  
409 computations make the same prediction due to better approximations over time (Lengyel et al., 2015) – either  
410 due to their iterative nature as in MCMC sampling (Fiser et al., 2010) or stochastic implementation Pouget  
411 et al. (2013). Interestingly, we found evidence that both observation noise and degree of approximation  
412 changed across the entire range of stimulus durations tested (Figure 7C,8C; Figure 7 Figure supplement 1).

413 Traditionally, perceptual inference has been conceptualized as a statistical problem of finding a signal in  
414 the noise (Swets et al., 1961). This framing has led to non-bias sources of suboptimality being introduced  
415 as external and internal noise (Lu and Doshier, 2008). In our model, external noise is included in the  
416 observation noise while internal noise is split into two parts. Noise that is associated with the sensor  
417 generating the observation (e.g. the retina) is included in the observation noise. On the other hand, internal  
418 noise associated with increased variability during downstream computations contributes to approximate  
419 computations.

420 Our work also suggests a new explanation for improvements in observer performance in the presence  
421 of choice-uninformative cues in general: approximate inference. For instance, a previous study found that  
422 non-spatial auditory signals can improve performance during a visual search task in a cluttered environment  
423 (Van der Burg et al., 2008).

424 Our mathematical formalization also deviates from traditional approaches in two more minor ways. First,  
425 we allow for a flexible mapping from external to internal sensory “coordinates”. The observation noise in  
426 external coordinates has long been known to be stimulus dependent. However, the internal coordinates  
427 are chosen such that the observation noise in internal coordinates becomes additive and Gaussian, thereby  
428 making further inferences analytically tractable. This formulation is a modification of the mapping used  
429 by (Acerbi et al., 2014) providing a more intuitive understanding of the mapping parameters and contains  
430 purely linear (as used in most Bayesian models) and purely logarithmic (Fechner, 1860) as special cases  
431 instead of limiting cases as in (Acerbi et al., 2014). Second, we characterize lapses in observer responses  
432 using two parameters, lapse rate and lapse bias, reflecting an assumption about the underlying generative  
433 model about how they arise: as a fraction of trials in which the observer strategy is qualitatively different  
434 from their usual stimulus-based strategy, possibly reflecting lapses in attention as commonly assumed, or  
435 exploratory strategies (Pisupati et al., 2021).

436 Perceptual decision-making is suboptimal in many ways. How to best formalize the sources of these sub-  
437 optimalities in order to arrive at models that better describe behavior, and that allow for deeper insights into

438 the underlying beliefs and computations, is an open question (Rahnev and Denison, 2018). Our work demon-  
439 strates the usefulness of a formalization in terms of the generative model and approximate computations,  
440 when applied to data from a task of higher complexity than classic discrimination tasks.

## 441 4 Methods

### 442 4.1 Bayesian observer model for binary discrimination tasks

443 We model observer responses in a binary discrimination task using the Bayesian observer model presented  
444 in Figure 1C. The process of making a response based on sensory observations involves two stages: (a) the  
445 perceptual decision stage and (b) the response stage. Each stage describes a particular stage of the decision  
446 making process and is used to systematically parameterize any deviation from optimality. We use the case of  
447 auditory binary discrimination as an example for describing the model but the model is general for any task  
448 where the observer has to classify a presented cue between different categories. In the auditory discrimination  
449 task considered, the observer has to report which side of the midline, (i.e. a decision boundary), the auditory  
450 tone/cue came from.

451 We model the sensory observations of the observer as deviating from the veridical position due to external  
452 and internal observation noise. We model this as a zero mean additive noise added to the veridical position  
453 on each trial as given in Eq. (2)

$$p(o|s_e) = \mathcal{N}(o; s_e, \sigma^2) \quad (2)$$

454 where  $\mathcal{N}(x; \mu, \sigma^2)$  denotes the normal PDF with a mean  $\mu$  and variance  $\sigma^2$ . This model assumes that the  
455 observations are unbiased. The variance of the noise in general can be dependent on the tone position (Webers  
456 law, Stevens law etc), i.e.  $\sigma^2 = f(s_e)$  where  $f$  is some function parameterizing the sensory noise. However,  
457 a position dependent variance makes the sensation distribution non gaussian which makes modeling further  
458 computations analytically intractable. However we can transform the cue position to internal coordinates  
459 (Acerbi et al. (2014)) such that the observation noise is cue independent in the internal coordinates as shown  
460 in Eq. (3)

$$p(o|s_e^{\text{int}}) = \mathcal{N}(o; s_e^{\text{int}}, \sigma^2) \quad (3)$$

461 We use a transformation

$$s_e^{\text{int}} = m(s_e) = \text{sgn}(s_e) \left[ \alpha \left( \frac{|s_e|}{s_{e,\text{max}}} \right)^d + (1 - \alpha) \frac{\log(1 + |s_e|)}{\log(1 + s_{e,\text{max}})} \right] \quad (4)$$

462 where  $s_e$  is the veridical cue position and  $s_e^{\text{int}}$  is the transformed value in internal coordinates.  $\alpha$  controls  
463 the interpolation between a pure power law (Steven’s law,  $\alpha = 1$ ) to a purely logarithmic mapping (Weber’s  
464 law,  $\alpha = 0$ ). The exponent  $d$  models the power law coefficient where  $d = 1$  corresponds to a purely linearly  
465 mapping which is the traditional assumption in Bayesian models for perceptual decision making.  $s_{e,\text{max}}$   
466 is used to define the maximum value that the cue position can take such. This ensures any value when  
467 transformed to internal coordinates lies between -1 and 1. While the transformation holds for cue positions  
468 greater than  $s_{e,\text{max}}$ , we can define the  $s_{e,\text{max}}$  as the edge of the screen in the experiment such that for any  
469 experiment, all cues lie within the specific maximum values. Since cue positions for most experiments defined  
470 in terms of visual angle are circular variables, the cue position in Eq. (4) can be shifted to lie within the  
471 principle range. The illustration of transformation of observation noise in internal coordinates is illustrated  
472 visually in Figure 2 Figure supplement 1

473 The perceptual decision stage describes how observers infer the beliefs about the latent causes that  
474 generated the sensory input. We consider two types of latent variables in the generative model: (a) perceptual  
475 latents that model the generative process for the observer’s observations and (b) task dependent latents that  
476 model the influence of task learning on the perceptual latents. In the discrimination task, the perceptual  
477 latent is the inferred tone position. We model all inferred variables to be in internal coordinates so we model  
478 the likelihood of the inferred tone position given in Eq. (5) to have the same form as Eq. (3) thereby  
479 assuming that the observers have learned a good estimate of their observation noise over lifelong learning.

$$p(o|x) = \mathcal{N}(o; x, \sigma^2) \quad (5)$$

480 The task dependent latent is the decision variable (denoted by  $D$ ) that represents the side of the decision  
 481 boundary (assigned as the midline/zero without loss of generality) that the tone came from. The distribution  
 482 over the inferred tone position conditioned on the decision variable is proportional to the product of two  
 483 components as given in Eq. (6)

$$p(x|D) \propto f_{\text{natural}}(x)f_{\text{task}}(x|D) \quad (6)$$

484 The proportionality constant can be obtained by integrating Eq. (6) over the support of  $x$ . The first  
 485 component  $f_{\text{natural}}(x)$  represents the natural prior over tone positions that the observer has learned over  
 486 lifelong learning independent of performing the task. We model this component as a gaussian distribution  
 487 as given in Eq. (7)

$$f_{\text{natural}}(x) = \mathcal{N}(x; \mu, \sigma_p^2) \quad (7)$$

488 The second component partitions the space of  $x$  conditioned on the value of  $D$ . Denoting the value of  $D$   
 489 as 1 if the tone position is to the right of midline and -1 if the tone position is to the left of the midline, we  
 490 define  $f_{\text{task}}(x|D)$  as the appropriate partitioning of the space of  $x$  depending on  $D$  as written compactly in  
 491 Eq. (8)

$$f_{\text{task}}(x|D) = H(Dx) \quad (8)$$

492 where  $H(x)$  is the heaviside function. The prior belief over  $D$  is modeled as a Bernoulli distribution with  
 493 a prior  $\beta' = \beta + \Phi\left(\frac{\mu}{\sigma_p}\right)$  (Eq. (9)) where  $\beta$  is the categorical bias.

$$p(D) = \text{Ber}(D; \beta') \quad (9)$$

494 Defining the prior over  $x$  as given in Eq. (6) allows us to model task specific beliefs for each partition  
 495 as specified by the prior belief over the decision variable (Eq. (9)) but also incorporate observer's natural  
 496 belief over the task variable (Eq. (7)) within each partition. The observer may or may not maintain separate  
 497 task specific beliefs over the tone position. Our framework allows us to model the case where the observer  
 498 does not have a separate task specific belief as is traditionally modeled when  $\beta$  is equal to the area of the  
 499 natural component to the right of the midline which is  $\Phi\left(\frac{\mu}{\sigma_p}\right)$  where  $\Phi$  is the standard cumulative Gaussian  
 500 distribution. Therefore any deviation of  $\beta$  from  $\Phi\left(\frac{\mu}{\sigma_p}\right)$  indicates the presence of a separate task specific  
 501 belief that we refer to as categorical bias.

502 The response stage describes how observers convert their inferred belief about the decision variable into  
 503 a response. Bayesian Decision theory provides a formal method of translating the posterior distribution over  
 504 beliefs into observer responses by minimizing the task specific loss function, i.e.

$$R_{\text{BDT}}^* = \arg \min_{r \in \{-1, 1\}} \sum_{d \in \{-1, 1\}} \mathcal{L}(D = d, R = r) p(D = d|o) \quad (10)$$

505 For the discrimination task with a 0-1 loss where the loss function is 0 if the observer reports the correct  
 506 side and 1 otherwise, the optimal strategy is to choose  $R_{\text{BDT}}^* = 1$  if  $p(D = 1|o) > 0.5$  and  $R_{\text{BDT}}^* = -1$   
 507 otherwise. However, the observer necessarily approximates the computation of  $p(D = 1|o)$  as exact Bayesian  
 508 inference is intractable. We quantify the degree of approximation using a sampling based scheme where the  
 509 observer uses a particular number of samples to approximate the posterior as given in Eq. (11)

$$\hat{p}(D|o) = \frac{1}{n_{\text{samp}}} \sum_{i=1}^{n_{\text{samp}}} D_i \quad (11)$$

510 where  $D_i \sim p(D|o)$ . Therefore under such an approximation scheme, the observer response strategy  
 511 becomes

$$R_{\text{BDT}} = \mathbb{I}[\hat{p}(D|o) > 0.5] \quad (12)$$

512 Intuitively, the observer draws  $n_{\text{samp}}$  samples from the posterior over D and chooses the side with the  
 513 majority number of samples.

514 The observer responses could, however, deviate from  $R_{\text{BDT}}$  due to other external factors like attentional  
 515 lapses, motor error etc. We model lapses as an independent corruption of the response (which we call  
 516 lapse responses) by two variables lapse rate ( $\lambda_r$ ) and lapse bias ( $\lambda_b$ ). Lapse rate models the frequency of  
 517 lapse responses and lapse bias models any bias towards D=1 while making a lapse response. This provides  
 518 an alternate parameterization of two lapses that characterize the upper and lower offset in psychometric  
 519 curve functions commonly used to model responses in binary discrimination tasks Fründ et al. (2011).  
 520 Mathematically, this is given in Eq. (13)

$$R = lR_{\text{lapse}} + (1 - l)R_{\text{BDT}} \quad (13)$$

521 where  $l$  indicates whether or not lapse occurred on a particular trial and is modeled as a bernoulli variable  
 522 as given in Eq. (14) and  $R_{\text{lapse}}$  models whether the observer made a response 1 or -1 which is also modeled  
 523 as a bernoulli variable as given in Eq. (15)

$$l \sim \text{Ber}(l; \lambda_r) \quad (14)$$

$$R_{\text{lapse}} \sim \text{Ber}(R_{\text{lapse}}; \lambda_b) \quad (15)$$

524 The distribution over observer responses for a given observation can be obtain by marginalizing over  $l$   
 525 and  $R_{\text{lapse}}$  in Eq. (13) using Eqs. (14) and (15) as given in (16)

$$p(R|o) = \lambda_r \lambda_b + (1 - \lambda_r)p(R_{\text{BDT}}|o) \quad (16)$$

526 While Eq. (16) describes the observer response for a given observation, this cannot be measured directly  
 527 by the experimenter. In turn they can only measure the observer response for a given  $s_e$  which forms the  
 528 psychometric curve. In order to evaluate the psychometric curve, we have to marginalize across all sensory  
 529 observations in Eq.(16) as given in Eq. (17)

$$p(R|s_e) = \int p(R|o)\mathcal{N}(o; m(s_e), \sigma^2)do \quad (17)$$

530 The integral in Eq.(17) is generally intractable but we derive an analytical approximation which is given  
 531 in Eq. (18)

$$p(R|s_e) = \lambda_r \lambda_b + (1 - \lambda_r)\Phi\left(\frac{m(s_e) + f(\mu, \sigma_p^2, \beta, \sigma^2)}{g(\sigma^2, \sigma_p^2, n_{\text{samp}})}\right) \quad (18)$$

532 The effective bias  $f(\mu, \sigma_p^2, \beta, \sigma^2)$  is

$$f(\mu, \sigma_p^2, \beta, \sigma^2) = \frac{\sigma}{\sqrt{\gamma_p}} \left[ -\frac{\mu}{\sigma_p} (1 - \sqrt{1 - \gamma_p}) + \Phi^{-1}(\beta') \right] \quad (19)$$

533 where  $\gamma_p$  is the cue combined weight on the observation, i.e.  $\frac{\sigma_p^2}{\sigma_p^2 + \sigma_a^2}$ ,  $\beta = \beta' - \Phi\left(\frac{\mu}{\sigma_p}\right)$  is the categorical  
 534 bias and  $\Phi^{-1}$  is the standard normal quantile function. The effective threshold is

$$g(\sigma^2, \sigma_p^2, n_{\text{samp}}) = \sigma \left\{ 1 + \frac{\psi_1[0.5(n_{\text{samp}} + 1)]}{\gamma_p \psi_1(1)} \right\} \quad (20)$$

535 where  $\psi_1$  is the trigamma function. The full derivation of Eq. (18) is given in the following section.

## 536 4.2 Derivation of Bayesian observer responses in binary discrimination task

537 In this section, we derive the analytical approximation for a Bayesian observer in binary discrimination tasks,  
 538 i.e. Eq. (18) in the previous section. We start with the response function (Eq. (12)) where the probability  
 539 of making a “right” response is given by

$$R_{\text{BDT}} = \mathbb{I}[\hat{p}(D = 1|o) > 0.5] \quad (12)$$

540 Given that  $\hat{p}(D = 1|o)$  is a sample mean based estimate of  $p(D = 1|o)$  using  $n_{\text{samp}}$  samples, the probability  
 541 that  $\hat{p}(D|o)$  is greater than 0.5 is the probability that sum of  $n_{\text{samp}}$  random draws from the Bernoulli  
 542 distribution with probability  $\hat{p}(D = 1|o)$  is greater than  $0.5n_{\text{samp}}$ . This can be written in terms of the  
 543 Binomial CDF  $\Phi_b$  as given in Eq. (21)

$$p(R_{\text{BDT}} = 1|o) = 1 - \Phi_b[0.5n_{\text{samp}}, n_{\text{samp}}, p(D = 1|o)] \quad (21)$$

544 We can use the property relating the Binomial CDF to a Beta CDF to obtain a continuous expansion of  
 545 Eq. (21) in terms of the beta cdf ( $\Phi_\beta$ ) as given in Eq. (22)

$$p(R_{\text{BDT}} = 1|o) = \Phi_\beta[p(D = 1|o); 0.5(n_{\text{samp}} + 1), 0.5(n_{\text{samp}} + 1)] \quad (22)$$

546 The advantage of Eq. (22) over Eq. (21) is that it provides an expression for the probability of the trial  
 547 category that is approximated using  $n_{\text{samp}}$  and interpolates to continuous values of  $n_{\text{samp}}$ . This is useful for  
 548 optimization and analytic purposes. Eq. (22) can be rewritten in terms of the definition of the Beta CDF  
 549 as given in Eq. (23)

$$p(R_{\text{BDT}} = 1|o) = \mathbb{E}_\zeta[\zeta < p(D = 1|o)] \quad (23)$$

550 where  $\zeta \sim \text{Beta}[0.5(n_{\text{samp}} + 1), 0.5(n_{\text{samp}} + 1)]$  is a beta random variable. The inequality in Eq. (23) can  
 551 be written in terms of the posterior odds over the trial category as shown in Eq. (24)

$$p(R_{\text{BDT}} = 1|o) = \mathbb{E}_\zeta \left[ \frac{\zeta}{1 - \zeta} < \frac{p(D = 1|o)}{p(D = -1|o)} \right] \quad (24)$$

552 We can use Eqs. (5) to (9) to expand Eq. (24) to get Eq. (25)

$$p(R_{\text{BDT}} = 1|o) = \mathbb{E}_\zeta \left[ \frac{\zeta}{1 - \zeta} < \frac{\Phi\left(\frac{\sigma\gamma_p + \mu(1 - \gamma_p)}{\sigma\sqrt{\gamma_p}}\right)\Phi\left(-\frac{\mu}{\sigma_p}\right)\beta'}{\Phi\left(-\frac{\sigma\gamma_p + \mu(1 - \gamma_p)}{\sigma\sqrt{\gamma_p}}\right)\Phi\left(\frac{\mu}{\sigma_p}\right)(1 - \beta')} \right] \quad (25)$$

553 We can rearrange Eq. (25) as follows

$$p(R_{\text{BDT}} = 1|o) = \mathbb{E}_\zeta \left\{ o > -\mu\frac{(1 - \gamma_p)}{\gamma_p} + \frac{\sigma}{\sqrt{\gamma_p}}\Phi^{-1} \left[ 1 + \frac{(1 - \zeta)\beta'\Phi\left(-\frac{\mu}{\sigma_p}\right)}{\zeta(1 - \beta')\Phi\left(\frac{\mu}{\sigma_p}\right)} \right]^{-1} \right\} \quad (26)$$

554 Eq. (26) shows an equivalence between the Bayesian observer and a signal detection theory model of  
 555 decision making where the criterion is now stochastic for finite  $n_{\text{samp}}$  and reduces to a deterministic criterion  
 556 for exact inference. Eq. (26) provides the probability of response for a particular sensory observation  $o$   
 557 which is inaccessible to the experimenter. The experimenter measures the probability of responding “right”  
 558 for a value of  $s_e$  that they vary to get the psychometric curve. Therefore, to get the probability of making  
 559 a response  $R_{\text{BDT}} = 1$  for a given  $s$ , we have to compute the expected probability of Eq. (26) under the  
 560 generative process of  $o$  given in Eq. (17) as shown in

$$p(R_{\text{BDT}} = 1|s_e) = \mathbb{E}_o \mathbb{E}_\zeta \left\{ o > -\mu\frac{(1 - \gamma_p)}{\gamma_p} + \frac{\sigma}{\sqrt{\gamma_p}}\Phi^{-1} \left[ 1 + \frac{(1 - \zeta)\beta'\Phi\left(-\frac{\mu}{\sigma_p}\right)}{\zeta(1 - \beta')\Phi\left(\frac{\mu}{\sigma_p}\right)} \right]^{-1} \right\} \quad (27)$$

561 Since, the expectation is commutative, we can reorder the expectation above and write it in terms of the  
 562 normal CDF to get

$$p(R_{\text{BDT}} = 1 | s_e) = \mathbb{E}_\zeta \Phi \left\{ \frac{m(s_e) + \mu \frac{(1-\gamma_p)}{\gamma_p} - \frac{\sigma}{\sqrt{\gamma_p}} \Phi^{-1} \left[ 1 + \frac{(1-\zeta)\beta' \Phi(-\frac{\mu}{\sigma_p})}{\zeta(1-\beta') \Phi(\frac{\mu}{\sigma_p})} \right]^{-1}}{\sigma} \right\} \quad (28)$$

563 Using an approximation that  $\Phi^{-1}(x) \approx cs^{-1}(x)$  where  $s$  is the logistic sigmoid function (see equivalence  
564 analysis in (Drugowitsch et al., 2016)), we can simplify Eq. (28) to get

$$p(R_{\text{BDT}} = 1 | s_e) = \mathbb{E}_\zeta \Phi \left( \frac{m(s_e) + f(\mu, \sigma_p^2, \beta, \sigma^2) - \frac{\sigma}{\sqrt{\gamma_p}} \Phi^{-1}(\zeta)}{\sigma} \right) \quad (29)$$

where

$$f(\mu, \sigma_p^2, \beta, \sigma^2) = \frac{\sigma}{\sqrt{\gamma_p}} \left[ -\frac{\mu}{\sigma_p} (1 - \sqrt{1 - \gamma_p}) + \Phi^{-1}(\beta') \right]$$

565 and  $\beta = \beta' - \Phi\left(\frac{\mu}{\sigma_p}\right)$  is the categorical bias

566 We can also approximate  $\Phi^{-1}(\zeta)$  with moment matched gaussian distribution that has a mean of 0 and  
567 variance  $2c^2\psi_1(0.5n_{\text{samp}} + 1)$  where  $\psi_1$  is the trigamma function and  $c$  is the approximation constant relating  
568 the cumulative normal cdf to a logistic sigmoid, i.e.  $\Phi^{-1}(x) \approx cs^{-1}(x)$ . We can analytically evaluate the  
569 expectation in Eq. (29) under this normal approximation to get Eq. (18)

$$p(R | s_e) = \lambda_r \lambda_b + (1 - \lambda_r) \Phi \left( \frac{m(s_e) + f(\mu, \sigma_p^2, \beta, \sigma^2)}{g(\sigma^2, \sigma_p^2, n_{\text{samp}})} \right) \quad (18)$$

570 where

$$g(\sigma^2, \sigma_p^2, n_{\text{samp}}) = \sigma \left\{ 1 + \frac{\psi_1[0.5(n_{\text{samp}} + 1)]}{\gamma_p \psi_1(1)} \right\}$$

### 571 4.3 Task description for the choice uninformative cue tasks

572 We briefly describe the task in Cappelloni et al. (2019) which we refer to as the choice-uninformative cue  
573 task. On each trial, the observer observes two auditory stimuli: a tone (harmonics of 220 Hz) and noise.  
574 The noise was a randomly generated pink noise pattern with energy between 220 and 4000 Hz. Both the  
575 tone and noise had a with a 1/f spectral envelope. The auditory stimuli were accompanied with two visual  
576 shapes which were regular polygons inscribed in a circle with diameter 1.5 deg. The polygons were generated  
577 with constant luminance, saturation and opposite hues with number of sides randomly generated between  
578 four and eight such that the sides had different shapes on each trial. On every trial, the observer fixated at  
579 the center and observed the visual stimuli that appeared 100 ms before the auditory stimuli. The auditory  
580 stimuli were presented for 300 ms and both the auditory and visual cues ended together. The visual stimuli  
581 were presented at the midline in the “central” condition and aligned in eccentricity with the auditory stimuli  
582 in the “matched” condition. The observers had to report the side of the tone at the end of the trial. The  
583 eccentricities tested were 0.625, 1.25, 2.5, 5 and 10 degrees (both left and right) and there were 40 trials per  
584 condition resulting in a total of 800 trials across all conditions per observer.

585 In the variable duration version of the task (Cappelloni et al., 2020), the stimuli were the same but  
586 now the visual and auditory cue occurred concurrently. The four cues were presented for three different  
587 durations: 100 ms, 300 ms and 1000 ms. The stimuli were present in size 1 up 1 down staircase tracks  
588 that were interleaved with the separation between the tone and noise doubling when the observer made an  
589 incorrect response and reducing by a factor of  $2^{1/3}$  when the observer made a correct response.

### 590 4.4 Bayesian observer model description for the choice uninformative cue task

591 We extend the Bayesian observer model presented in section 4.1 to model auditory discrimination in the  
592 presence of choice uninformative visual cues. The observer’s generative model in this task is given in Figure

593 3C where we present only the sensation and perception stage as the response stage is same as the Bayesian  
 594 observer model in Figure 1C. The observer observes a tone and a noise which are drawn from the veridical  
 595 values  $s_a$  and  $-s_a$  corrupted by sensory noise as given in Eq. (30) where the cues are first transformed to  
 596 internal coordinates using a mapping function  $m$  [Eq. (4)]

$$p(o_a^{\text{tone}}, o_a^{\text{noise}} | s_a) = \mathcal{N}[o_a^{\text{tone}}; m(s_a), \sigma_{a,\text{tone}}^2] \mathcal{N}[o_a^{\text{noise}}; -m(s_a), \sigma_{a,\text{noise}}^2] \quad (30)$$

597 Similarly the observer observes a right and left visual cue which are drawn from the veridical values  $s_v$   
 598 and  $-s_v$  corrupted by sensory noise as given in Eq. (31) where the cues are first transformed to internal  
 599 coordinates using a mapping function  $m$  [Eq. (4)]

$$p(o_v^{\text{right}}, o_v^{\text{left}} | s_v) = \mathcal{N}[o_v^{\text{right}}; m(s_v), \sigma_v^2] \mathcal{N}[o_v^{\text{left}}; -m(s_v), \sigma_v^2] \quad (31)$$

600 The likelihood of the inferred tone position mirrors the generative process as in the case of the Bayesian  
 601 observer [Eq. (5)]. This is under the assumption that the observer has learned the task and combines  
 602 information from both tone and noise observations to infer the belief over tone position as given in Eq. (32)

$$p(o_a^{\text{tone}}, o_a^{\text{noise}} | x_a) = \mathcal{N}[o_a^{\text{tone}}; x_a, \sigma_{a,\text{tone}}^2] \mathcal{N}[o_a^{\text{noise}}; -x_a, \sigma_{a,\text{noise}}^2] \quad (32)$$

603 Similarly the likelihood of the right visual cue mirrors the generative process given in Eq. (31) under the  
 604 assumption that the observer uses both right and left visual cue information to infer the belief over the right  
 605 visual cue position as given in Eq. (33)

$$p(o_v^{\text{right}}, o_v^{\text{left}} | x_v) = \mathcal{N}[o_v^{\text{right}}; x_v, \sigma_v^2] \mathcal{N}[o_v^{\text{left}}; -x_v, \sigma_v^2] \quad (33)$$

606 We model multisensory perception using a causal inference model where the observer infers whether  
 607 or not the auditory and visual cues came from the same cause and use this to decide whether or not to  
 608 combine information across the two cues. The model consists of four perceptual latents: (i) unisensory tone  
 609 position ( $x_a$ ), (ii) unisensory right visual cue position ( $x_v$ ; right cue chosen without loss of generality), (iii)  
 610 multisensory cue combined position ( $x_{av}$ ) and (iv) inferred causal structure ( $C$ ). We also model task specific  
 611 beliefs using a decision variable that indicates the side of the tone w.r.t the midline. The joint prior over  
 612 the perceptual latents conditioned on the decision variable and the different values of the inferred causal  
 613 structure are given in (34) and (35)

$$p(x_a, x_v, x_{av} | D, C = 0) \propto f_{a,\text{natural}}(x_a) f_{v,\text{natural}}(x_v) f_{av,\text{natural}}(x_{av}) f_{\text{task}}(x_a | D) \quad (34)$$

$$p(x_a, x_v, x_{av} | D, C = 1) \propto \delta(x_a - x_{av}) \delta(x_v - Dx_{av}) f_{av,\text{natural}}(x_{av}) f_{\text{task}}(x_a | D) \quad (35)$$

614 The proportionality constant can be obtained by integrating Eq. (6) over the support of  $x_a, x_v$  and  $x_{av}$ .  
 615 The first three components represents the natural prior over the tone, right visual cue and the auditory-visual  
 616 combined cue positions which we model as a gaussian distribution as given in Eq. (36)

$$\begin{aligned} f_{a,\text{natural}}(x_a) &= \mathcal{N}(x_a; \mu, \sigma_p^2) \\ f_{v,\text{natural}}(x_v) &= \mathcal{N}(x_v; \mu, \sigma_p^2) H(x_v) \\ f_{av,\text{natural}}(x_{av}) &= \mathcal{N}(x_{av}; \mu, \sigma_p^2) \end{aligned} \quad (36)$$

617 The fourth component models the influence of the decision variable on the perceptual latents as it  
 618 partitions the space of  $x_a$  conditioned on the value of D as given in Eq. (37)

$$f_{\text{task}}(x_a | D) = H(Dx_a) \quad (37)$$

619 The prior belief over  $C$  is modeled as a Bernoulli distribution with a prior probability  $p_{\text{common}}$ . Similarly,  
 620 as was the case for the Bayesian observer, the prior belief over D is modeled as a bernoulli distribution with  
 621 a parameter  $\beta' = \beta + \Phi\left(\frac{\mu}{\sigma_p^2}\right)$ . These two equations are given in Eq. (38).

$$\begin{aligned} p(C) &= \text{Ber}(C; p_{\text{common}}) \\ p(D) &= \text{Ber}(D; \beta') \end{aligned} \quad (38)$$

622 The mapping of the posterior probability over the decision variable to observer response is the same as  
 623 the response stage described in section 4.1 [Eqs. (10) to (16)]. The observer response for given sensory  
 624 observations can therefore be written as

$$p(R|\mathbf{o}) = \lambda_r \lambda_b + (1 - \lambda_r) p(R_{\text{BDT}}|\mathbf{o}) \quad (39)$$

625 where  $o_a^{\text{tone}}, o_a^{\text{noise}}, o_v^{\text{right}}, o_v^{\text{left}}$  are abbreviated as  $\mathbf{o}$ .  $\lambda_r$  is the lapse rate which is the probability of making  
 626 a lapse response and  $\lambda_b$  is the lapse bias which is the probability of making a “right” response when lapsing.  
 627 Further details about evaluating  $p(R_{\text{BDT}}|\mathbf{o})$  are given in the. As in section 4.1,  $R_{\text{BDT}}$  is the response of the  
 628 Bayesian observer approximated using  $n_{\text{samp}}$  samples

$$R_{\text{BDT}} = \mathbb{I}[\hat{p}(D|\mathbf{o}) > 0.5] \quad (40)$$

$$\hat{p}(D|\mathbf{o}) = \frac{1}{n_{\text{samp}}} \sum_{i=1}^{n_{\text{samp}}} D_i \quad (41)$$

629 where  $D_i \sim p(D|\mathbf{o})$ . In order to evaluate the psychometric curve for given experimenter defined positions,  
 630 we have to marginalize across all sensory observations in Eq.(39) as given in Eq. (42)

$$\begin{aligned} p(R|s_a, s_v) &= \int do_v \int do_a p(R|\mathbf{o}) \mathcal{N}[o_a^{\text{tone}}; m(s_a), \sigma_{a,\text{tone}}^2] \mathcal{N}[o_a^{\text{noise}}; -m(s_a), \sigma_{a,\text{noise}}^2] \\ &\quad \mathcal{N}[o_v^{\text{right}}; m(s_v), \sigma_v^2] \mathcal{N}[o_v^{\text{left}}; -m(s_v), \sigma_v^2] \end{aligned} \quad (42)$$

631 Since the integral in Eq. (42) is analytically intractable, we approximated the integrals using gaussian  
 632 quadrature (Golub and Welsch, 1969). Gaussian quadratures provide a good approximation to the integral  
 633 when  $p(R|\mathbf{o})$  is smooth. This is the case when  $n_{\text{samp}}$  is small. For larger values, the integrand becomes  
 634 closer to a step function with the decision boundary becoming discontinuous. Therefore for the exact infer-  
 635 ence comparison models, we computed the decision boundary using a multi-dimensional bisection method  
 636 (Bachrathy and Stépan, 2012) and then used this to compute the integral analytically. Given the predicted  
 637 response from the model we can evaluate the likelihood of the observer responses  $\mathbf{r}$  measured empirically for  
 638 experimenter defined cue positions  $\mathbf{s}_a, \mathbf{s}_v$  as given in Eq. (43)

$$p(\mathbf{r}|\mathbf{s}_a, \mathbf{s}_v) = \prod_i \text{Bin}[n_i, r_i, p(R|s_a, s_v)] \quad (43)$$

639 We obtained the maximum a posteriori (MAP) estimate for the model parameters under weakly infor-  
 640 mative priors using a quasi-newton Broyden-Fletcher-Goldfarb-Shanno (BFGS) unconstrained optimization  
 641 procedure (fminunc in MATLAB) starting with 100 restarts to find the global optimum. We also obtained full  
 642 posteriors over parameters using generalized elliptical slice sampling (Nishihara et al., 2014) which allowed  
 643 us to get uncertainty estimates over parameter estimates.

In order get a goodness of fit estimate of the model, we computed the explainable variance explained  
 (EVE) as described in (Haefner and Cumming, 2008). This estimate is an extension of the tradition variance  
 explained/coefficient of determination but accounts for the uncertainty in the data generation process which  
 is the case for us with limited number of trials per condition. In addition, it corrects for the number of  
 parameters in the model to allow for overfitting. We also use Bayes Factor (Kass and Raftery, 1995) to  
 perform model comparison. Computing the Bayes factor requires computing the marginal likelihood which  
 requires evaluating the intractable integral in Eq. (44)

$$p(\mathbf{r}|\mathbf{s}_a, \mathbf{s}_v) = \int p(\mathbf{r}|\theta, \mathbf{s}_a, \mathbf{s}_v) p(\theta) d\theta \quad (44)$$



We approximate this using importance sampling as shown in Eq. (45)

$$p(\mathbf{r}|\mathbf{s}_a, \mathbf{s}_v) = \int p(\mathbf{r}|\theta, \mathbf{s}_a, \mathbf{s}_v) \frac{p(\theta)}{q(\theta)} q(\theta) d\theta \quad (45)$$

644 The quality of the approximation depends on how similar  $q(\theta)$  is to the posterior  $p(\theta|\mathbf{r}, s_a, s_v)$ . Therefore  
 645 we approximate the posterior using a variational laplace approximation (Daunizeau, 2017) to approximate the  
 646 posterior using a normal distribution and use that for evaluating the importance sampling based expectation.  
 647 We improved the quality of the importance sampling approximation by using a Pareto fit smoothing to the  
 648 weights as described in (Vehtari et al., 2015) and used a large number of samples (10000) to get a good  
 649 estimate of the Bayes factor.

#### 650 4.5 Derivation of observer responses in the choice uninformative cue task

651 We present a further derivation of the observer responses in the choice uninformative cue task and then  
 652 present an approximation in the case when the visual uncertainty is much smaller than the auditory un-  
 653 certainty. The response stage for the observer is the same as that described for the Bayesian observer in a  
 654 binary discrimination task. Therefore the probability of response as predicted by Bayesian Decision Theory  
 655 is

$$p(R_{\text{BDT}} = 1|\mathbf{o}) = \mathbb{E}_\zeta \left[ \frac{\zeta}{1-\zeta} < \frac{p(D=1|\mathbf{o})}{p(D=-1|\mathbf{o})} \right] \quad (24)$$

656 where  $o_a^{\text{tone}}, o_a^{\text{noise}}, o_v^{\text{right}}, o_v^{\text{left}}$  are together abbreviated as  $\mathbf{o}$ . Since the experimenter only has access to  $s_a$   
 657 and  $s_v$ , in order to get the predicted probability of making a response  $R_{\text{BDT}} = 1$  for a given  $s_a$  and  $s_v$ , we  
 658 have to compute the expected probability of Eq. (26) under the generative process of  $\mathbf{o}$  given in Eqs. (30)  
 659 and (31) as shown in

$$p(R_{\text{BDT}} = 1|\mathbf{o}) = \mathbb{E}_\mathbf{o} \mathbb{E}_\zeta \left[ \frac{\zeta}{1-\zeta} < \frac{p(D=1|\mathbf{o})}{p(D=-1|\mathbf{o})} \right] \quad (46)$$

660 The belief about the trial category depends on the inferred causal structure and therefore we marginalize  
 661 across the different causal structures to get  $p(D=1|\mathbf{o})$

$$p(D=1|\mathbf{o}) = \sum_{c=\{0,1\}} p(D=1|\mathbf{o}, C=c)p(C=c|\mathbf{o}) \quad (47)$$

662 The conditional distribution  $p(D=1|\mathbf{o}, C=c)$  can be evaluated by marginalizing across the perceptual  
 663 latents as given in

$$p(D=1|\mathbf{o}, C=c) \propto \int \int \int p(\mathbf{o}|x_a, x_v, x_{av}) p(x_a, x_v, x_{av}|C=c, D=1) p(D=1) \quad (48)$$

664 Using equations 23-29, we can infer the conditional belief over the trial category if the inferred causal  
 665 structure is  $C=0$  as given in Eq. (49)

$$p(D=1|\mathbf{o}, C=0) \propto \frac{\Phi\left(\frac{o_a \gamma_{ap} + \mu(1-\gamma_{ap})}{\sigma_a \sqrt{\gamma_{ap}}}\right)}{\Phi\left(\frac{\mu}{\sigma_p}\right)} \beta'$$

$$p(D=-1|\mathbf{o}, C=0) \propto \frac{\Phi\left(-\frac{o_a \gamma_{ap} + \mu(1-\gamma_{ap})}{\sigma_a \sqrt{\gamma_{ap}}}\right)}{\Phi\left(-\frac{\mu}{\sigma_p}\right)} (1-\beta') \quad (49)$$

666 where  $o_a = o_a^{\text{tone}}\gamma_{tn} - o_a^{\text{noise}}(1 - \gamma_{tn})$  is the cue combined auditory position estimate,  $\gamma_{tn} = \frac{\sigma_{a,\text{noise}}^2}{\sigma_{a,\text{tone}}^2 + \sigma_{a,\text{noise}}^2}$ ,  
 667  $\gamma_{ap} = \frac{\sigma_p^2}{\sigma_p^2 + \sigma_a^2}$  and  $\sigma_a^2 = \sigma_{a,\text{tone}}^2\gamma_{tn}$ . Similarly we can infer the conditional belief over the trial category if the  
 668 inferred causal structure is  $C = 1$  as given in Eq. (50)

$$p(D = 1|\mathbf{o}, C = 1) \propto \frac{\Phi\left(\frac{o_{av,1}\gamma_{avp} + \mu(1 - \gamma_{avp})}{\sigma_{av}\sqrt{\gamma_{avp}}}\right)}{\Phi\left(\frac{\mu}{\sigma_p}\right)} \mathcal{N}(o_a; o_v, \sigma_a^2 + \sigma_v^2) \mathcal{N}(o_{av,1}; \mu, \sigma_a^2\gamma_{av} + \sigma_p^2)\beta'$$

$$p(D = -1|\mathbf{o}, C = 1) \propto \frac{\Phi\left(\frac{-o_{av,-1}\gamma_{avp} + \mu(1 - \gamma_{avp})}{\sigma_{av}\sqrt{\gamma_{avp}}}\right)}{\Phi\left(-\frac{\mu}{\sigma_p}\right)} \mathcal{N}(o_a; -o_v, \sigma_a^2 + \sigma_v^2) \mathcal{N}(o_{av,-1}; \mu, \sigma_a^2\gamma_{av} + \sigma_p^2)\beta' \quad (50)$$

669 where  $o_{av,1} = o_a\gamma_{av} + o_v(1 - \gamma_{av})$ ,  $o_{av,-1} = o_a\gamma_{av} - o_v(1 - \gamma_{av})$ ,  $\gamma_{av} = \frac{\sigma_{v'}^2}{\sigma_{v'}^2 + \sigma_a^2}$ ,  $\sigma_{v'}^2 = 0.5\sigma_v^2$ ,  $\gamma_{av} = \frac{\sigma_p^2}{\sigma_a^2\gamma_{av} + \sigma_p^2}$ .  
 670 We can also evaluate the posterior probability over common cause using Eqs. (49) and (50) as given in (51)

$$p(C = c|\mathbf{o}) = \sum_{d=\{0,1\}} p(D = 1|\mathbf{o}, C = c)p(C = c) \quad (51)$$

#### 671 Approximate characterization of observer responses in the choice uninformative cue task

672 In order to get an interpretable functional form for observer responses, we make two assumptions: (a) For  
 673 eccentricities sufficiently far from the midlines, the central condition always corresponds to the observer  
 674 inferring  $C = 0$  and the matched condition always corresponds to the observer inferring  $C = 1$  (b) Also, we  
 675 assume that the visual cue is very reliable, i.e.  $\sigma_v^2 \rightarrow 0$

676 Substituting Eq.(49) in Eq.(46) and following the derivation similar to the traditional binary discrimina-  
 677 tion task, we can approximate the probability of observer response in the central condition as

$$p(R|s_a, s_v, C = 0) = \lambda_r\lambda_b + (1 - \lambda_r)\Phi\left(\frac{m(s_a) + \frac{(1 - \gamma_{ap})}{\gamma_{ap}}\mu + \frac{\sigma_a}{\sqrt{\gamma_{ap}}}\left[\Phi^{-1}(\beta') - \frac{\mu}{\sigma_p}\right]}{\sigma_a\left\{1 + \frac{\psi_1[0.5(n_{\text{samp}} + 1)]}{\gamma_{ap}\psi_1(1)}\right\}}\right) \quad (52)$$

678 Similarly, the probability of observer response in the matched condition is given in Eq. (53)

$$p(R|s_a, s_v, C = 1) = \lambda_r\lambda_b + (1 - \lambda_r)\Phi\left(\frac{m(s_a) + \frac{(1 - \gamma_{ap})}{\gamma_{ap}}\mu - \frac{\sigma_a^2}{2s_v}\left\{s^{-1}(\beta') - s^{-1}\left[\Phi\left(\frac{\mu}{\sigma_p}\right)\right]\right\}}{\sigma_a\left\{1 + \frac{\sigma_a^2}{s_v^2}\psi_1[0.5(n_{\text{samp}} + 1)]\right\}}\right) \quad (53)$$

679 Intuitively, thresholds measured at different visual eccentricities from the matched condition allow us to  
 680 separate the observation noise and number of samples. Measuring the biases for different visual eccentricities  
 681 can allow us to separate the perceptual and categorical biases.

## 682 4.6 Combining observer responses into responses of an aggregate observer

683 While there is no analytical solution relating the observer responses to the experimenter defined cues positions  
 684 in the choice uninformative cue task, we can approximate the response to a form (see previous section) as  
 685 given below

$$p(R = 1|s_a, s_v) \approx \lambda\lambda_r + (1 - \lambda)\Phi\left[\frac{m(s_a) + \frac{(1 - \gamma_{ap})}{\gamma_{ap}}\mu + t_1}{\sigma_a t_2}\right] \quad (54)$$

686 where  $\lambda$  is the lapse rate,  $\lambda_r$  is the lapse bias,  $\gamma_{ap} = \frac{\sigma_{a,\text{prior}}^2}{\sigma_a^2 + \sigma_{a,\text{prior}}^2}$ ,  $\sigma_a^2$  is the observation noise,  $m(s)$  is  
 687 the mapping function and  $\mu, \sigma_{a,\text{prior}}^2$  are the prior mean and variance over tone positions. The mapping

688 function  $T$  maps experimenter defined locations  $s_a$  to an internal measurement space such that any stimulus  
 689 dependence on eccentricity is mapped to a stimulus independent uncertainty.  $t_1$  and  $t_2$  are functions of other  
 690 parameters mainly visual cue location, categorical priors and number of samples respectively.  $t_1$  and  $t_2$  are 0  
 691 and 1 respectively, for observers who have no categorical biases (categorical prior matches perceptual prior)  
 692 and perform exact inference. The left hand side of Eq. 1 is what we estimate by getting the proportion  
 693 of rightward responses for a given  $s_a, s_v$  pair which we denote as  $\pi_R$ . Since all the parameters differ from  
 694 observer to observer, we can rewrite Eq. (54) for a observer  $i$  to get

$$\pi_{R,eff}^i = \Phi \left[ \frac{s_{a,eff}^i + t_1^i}{t_2^i} \right] \quad (55)$$

695 where  $s_{a,eff}^i = \frac{m(s_a) + \frac{(1-\gamma_{ap}^i)}{\sigma_a^i} \mu^i}{\sigma_a^i}$  and  $\pi_{R,eff}^i = \frac{\pi_R^i - \lambda^i \lambda_r^i}{(1-\lambda^i)}$ . We can see from Eq. (55) that deviations of  
 696  $\pi_{R,eff}^i$  from  $\Phi(s_{a,eff}^i)$  arise as a result of the observer having either a categorical bias or performing exact  
 697 inference. Therefore if we combine responses across observers into an aggregate observer after mapping  
 698 the  $s_a^i, \pi_R^i \rightarrow s_{a,eff}^i, \pi_{R,eff}^i$ , then any deviation between  $\pi_{R,eff}^{combined}$  and  $\Phi(s_{a,eff}^{combined})$  will contain information  
 699 about the categorical biases and number of samples across observers. Since we do not have access to the  
 700 true parameters for the observer, we sample from the posterior over the observer parameters. We therefore  
 701 construct an aggregate observer using each parameter sample to get a distribution over aggregate observer  
 702 responses. The number of trials that come from a observer for a given  $s_{a,eff}^i$  is  $(1-\lambda^i)n^i$  where  $n^i$  are the  
 703 original number of trials for  $s_a^i$  to compensate for the lapse responses made by the observer. Instead of  
 704 just fitting  $t_1$  and  $t_2$  to the aggregate observer, we fit the full model to the aggregate observer to allow for  
 705 deviations of sample estimate from the true value and the approximation involved in obtaining Eq. (54).

## 706 4.7 Modeling observer responses in the variable duration task

707 Unlike the fixed duration task where the observer responses were measured with a fixed set of stimuli, in  
 708 the variable duration task, the observer responses were collected along a staircase procedure. The model in  
 709 Figure 3C was fit separately to each duration while fixing the perceptual parameters across durations. In  
 710 other words, we allow for different degree of approximation, sensory noise and lapse parameters for different  
 711 durations while fixing the prior parameters. As in the previous section, we compare the approximate inference  
 712 model to the exact inference model. We also compare the full approximate inference model to another  
 713 approximate inference model where the degree of approximation is fixed across durations.

## 714 Code and data availability

715 Code and data available at <https://osf.io/6xbzt/>

## References

- Luigi Acerbi, Wei Ji Ma, and Sethu Vijayakumar. A framework for testing identifiability of Bayesian models of perception. *Advances in Neural Information Processing Systems*, 2(January):1026–1034, 2014.
- Daniel E. Acuna, Max Berniker, Hugo L. Fernandes, and Konrad P. Kording. Using psychophysics to ask if the brain samples or maximizes. *Journal of Vision*, 15(3):1–16, 2015.
- Dániel Bachrathy and Gábor Stépán. Bisection method in higher dimensions and the efficiency number. *Periodica Polytechnica Mechanical Engineering*, 56(2):81–86, 2012.
- Jeffrey M. Beck, Wei Ji Ma, Xaq Pitkow, Peter E. Latham, and Alexandre Pouget. Not Noisy, Just Wrong: The Role of Suboptimal Inference in Behavioral Variability. *Neuron*, 74(1):30–39, 2012. Publisher: Elsevier Inc.
- Jeffrey S. Bowers and Colin J. Davis. Bayesian just-so stories in psychology and neuroscience. *Psychological Bulletin*, 138(3):389–414, 2012.
- Bingni W Brunton, Matthew M Botvinick, and Carlos D Brody. Rats and humans can optimally accumulate evidence for decision-making. *Science*, 340(6128):95–98, 2013.
- Madeline S. Cappelloni, Sabyasachi Shivkumar, Ralf M. Haefner, and Ross K. Maddox. Task-uninformative visual stimuli improve auditory spatial discrimination in humans but not the ideal observer. *PLOS ONE*, 14(9):e0215417, September 2019.
- Madeline S. Cappelloni, Sabyasachi Shivkumar, Ralf M. Haefner, and Ross K. Maddox. Effects of auditory reliability and ambiguous visual stimuli on auditory spatial discrimination. preprint, *Animal Behavior and Cognition*, June 2020.
- Jean Daunizeau. The variational laplace approach to approximate bayesian inference. *arXiv preprint arXiv:1703.02089*, 2017.
- Jan Drugowitsch, Valentin Wyart, Anne Dominique Devauchelle, and Etienne Koechlin. Computational Precision of Mental Inference as Critical Source of Human Choice Suboptimality. *Neuron*, 92(6):1398–1411, 2016. Publisher: Elsevier Inc.
- Marc O. Ernst and Martin S. Banks. Humans integrate visual and haptic information in a statistically optimal fashion. *Nature*, 415(6870):429–433, January 2002.
- Gustav Theodor Fechner. *Elemente der psychophysik*, volume 2. Breitkopf u. Härtel, 1860.
- József Fiser, Pietro Berkes, Gergő Orbán, and Máté Lengyel. Statistically optimal perception and learning: from behavior to neural representations. *Trends in cognitive sciences*, 14(3):119–130, 2010.
- Ingo Fründ, N Valentin Haenel, and Felix A Wichmann. Inference for psychometric functions in the presence of nonstationary behavior. *Journal of vision*, 11(6):16–16, 2011.
- Justin L. Gardner. Optimality and heuristics in perceptual neuroscience. *Nature Neuroscience*, 22(4):514–523, 2019.
- Wilson S. Geisler. Contributions of ideal observer theory to vision research. *Vision Research*, 51(7):771–781, 2011. Publisher: Elsevier Ltd.
- Joshua I. Gold and Michael N. Shadlen. The Neural Basis of Decision Making. *Annual Review of Neuroscience*, 30(1):535–574, July 2007.
- Gene H Golub and John H Welsch. Calculation of gauss quadrature rules. *Mathematics of computation*, 23(106):221–230, 1969.
- David Marvin Green, John A Swets, et al. *Signal detection theory and psychophysics*, volume 1. Wiley New York, 1966.

- 758 Ralf Haefner and Bruce Cumming. An improved estimator of variance explained in the presence of noise.  
759 *Advances in neural information processing systems*, 21:585–592, 2008.
- 760 Thomas F. Icard. Bayes, Bounds, and Rational Analysis. *Philosophy of Science*, 85(1):79–101, January 2018.
- 761 Robert E Kass and Adrian E Raftery. Bayes factors. *Journal of the american statistical association*, 90(430):  
762 773–795, 1995.
- 763 Konrad P Körding, Ulrik Beierholm, Wei Ji Ma, Steven Quartz, Joshua B Tenenbaum, and Ladan Shams.  
764 Causal inference in multisensory perception. *PloS one*, 2(9):e943, January 2007.
- 765 Tai Sing Lee and David Mumford. Hierarchical Bayesian inference in the visual cortex. *Journal of the Optical  
766 Society of America A*, 20(7):1434, July 2003.
- 767 Máté Lengyel,  Koblinger, Marjena Popovi, and Jzsef Fiser. On the role of time in perceptual  
768 decision making. *arXiv preprint arXiv:1502.03135*, 2015.
- 769 Daniel Linares, David Aguilar-Lleyda, and Joan Lpez-Moliner. Decoupling sensory from decisional choice  
770 biases in perceptual decision making. *eLife*, 8:1–16, 2019.
- 771 Zhong-Lin Lu and Barbara Anne Doshier. Characterizing observers using external noise and observer models:  
772 assessing internal representations with external noise. *Psychological review*, 115(1):44, 2008.
- 773 Wei Ji Ma. Bayesian Decision Models: A Primer. *Neuron*, 104(1):164–175, 2019. Publisher: Elsevier Inc.
- 774 Robert Nishihara, Iain Murray, and Ryan P Adams. Parallel mcmc with generalized elliptical slice sampling.  
775 *The Journal of Machine Learning Research*, 15(1):2087–2112, 2014.
- 776 Jean-Paul Noel, Sabyasachi Shivkumar, Kalpana Dokka, Ralf Haefner, and Dora Angelaki. Aberrant causal  
777 inference and presence of a compensatory mechanism in autism spectrum disorder. 2021.
- 778 Brian Odegaard, David R. Wozny, and Ladan Shams. Biases in Visual, Auditory, and Audiovisual Perception  
779 of Space. *PLoS Computational Biology*, 11(12):1–23, 2015.
- 780 Sashank Pisupati, Lital Chartarifsky-Lynn, Anup Khanal, and Anne K Churchland. Lapses in perceptual  
781 decisions reflect exploration. *eLife*, 10:e55490, January 2021.
- 782 Alexandre Pouget, Jeffrey M Beck, Wei Ji Ma, and Peter E Latham. Probabilistic brains: knowns and  
783 unknowns. *Nature neuroscience*, 16(9):1170–1178, 2013.
- 784 Dobromir Rahnev and Rachel N. Denison. Suboptimality in perceptual decision making. *The Behavioral  
785 and brain sciences*, 41:e225, 2018.
- 786 Adam N Sanborn and Nick Chater. Bayesian Brains without Probabilities. *Trends in Cognitive Sciences*, 20  
787 (12):883–893, 2016. Publisher: Elsevier Ltd.
- 788 Ladan Shams and Ulrik R. Beierholm. Causal inference in perception. *Trends in Cognitive Sciences*, 14(9):  
789 425–432, 2010. Publisher: Elsevier Ltd.
- 790 Gabriel M Stine, Ariel Zylberberg, Jochen Ditterich, and Michael N Shadlen. Differentiating between inte-  
791 gration and non-integration strategies in perceptual decision making. *Elife*, 9:e55365, 2020.
- 792 Alan A Stocker and Eero Simoncelli. Sensory adaptation within a bayesian framework for perception.  
793 *Advances in neural information processing systems*, 18, 2005.
- 794 Alan A Stocker and Eero P Simoncelli. Noise characteristics and prior expectations in human visual speed  
795 perception. *Nature Neuroscience*, 9(4):578–585, April 2006.
- 796 John A. Swets, Wilson P. Tanner, and Theodore G. Birdsall. Decision Processes In Perception. *Psychological  
797 Review*, 68(5):301–340, 1961.

- 798 Erik Van der Burg, Christian NL Olivers, Adelbert W Bronkhorst, and Jan Theeuwes. Pip and pop:  
799 nonspatial auditory signals improve spatial visual search. *Journal of Experimental Psychology: Human*  
800 *Perception and Performance*, 34(5):1053, 2008.
- 801 Aki Vehtari, Daniel Simpson, Andrew Gelman, Yuling Yao, and Jonah Gabry. Pareto smoothed importance  
802 sampling. *arXiv preprint arXiv:1507.02646*, 2015.
- 803 Edward Vul, Noah Goodman, Thomas L. Griffiths, and Joshua B. Tenenbaum. One and done? Optimal  
804 decisions from very few samples. *Cognitive Science*, 38(4):599–637, 2014.
- 805 David R. Wozny, Ulrik R. Beierholm, and Ladan Shams. Probability matching as a computational strategy  
806 used in perception. *PLoS Computational Biology*, 6(8), 2010. ISBN: 1553-7358 (Electronic)\r1553-734X  
807 (Linking).
- 808 Valentin Wyart and Etienne Koechlin. Choice variability and suboptimality in uncertain environments.  
809 *Current Opinion in Behavioral Sciences*, 11:109–115, 2016. Publisher: The Author(s).
- 810 Alan Yuille and Daniel Kersten. Vision as Bayesian inference: analysis by synthesis? *Trends in Cognitive*  
811 *Sciences*, 10(7):301–308, July 2006.

## 812 **Supplementary Figures**

### 813 **Figure 2 Figure supplement 1**

814 Illustration of the cue-position dependent sensory noise obtained by using a non-linear transformation to  
815 internal coordinates and then adding a cue position independent sensory noise (Eq. (3)). The experimenter  
816 defined cue position, which we refer to as external position is transformed to internal coordinates with a  
817 mapping that lies between a linear and logarithmic mapping. If the mapping is linear, then the observation  
818 noise is independent of cue position in the internal coordinates. If the transformation is logarithmic, then the  
819 observation noise scales with cue position. This is depicted using the errorbars where the vertical errorbars  
820 indicate the observation noise in internal coordinates that is cue independent. The horizontal errorbars  
821 depict the corresponding uncertainty in external position which scales with position for logarithmic and  
822 intermediate mappings

### 823 **Figure 3 Figure supplement 1**

824 Power analysis that shows the probability of getting substantial evidence (measured using AIC) in favor of  
825 two systematic extensions to the ideal observer model: solid line showing the approximate inference model as  
826 compared to a observer performance exact inference and dashed line showing the model having a categorical  
827 bias in addition to a perceptual bias as compared to a model having no categorical bias. Traditional binary  
828 discrimination task provide zero evidence in favor of both extensions.

### 829 **Figure 5 Figure supplement 1**

830 Absolute goodness of fit quantified by Explainable Variance Explained (EVE, (Haefner and Cumming, 2008))  
831 which is the proportion of variance in the data that is predicted by the model adjusted for uncertainty in  
832 the data and number of parameters in the model. Goodness of fit presented for: **(A)** Fixed duration tasks  
833 for individual observers **(B)** Fixed duration tasks for aggregate observer **(C)** Variable duration tasks for  
834 individual observers **(D)** Variable duration tasks for aggregate observer

### 835 **Figure 7 Figure supplement 1**

836 Relative contribution of approximate inference to the measured threshold. For each observer, the relative  
837 threshold contribution is calculated as one minus the ratio of the threshold predicted under exact inference to  
838 the total threshold. The decrease in threshold contribution due to approximate inference is greatest for the  
839 shortest duration. Significance was assessed using a non parametric sign test and the decrease in threshold  
840 contribution from 100 ms to 300 ms was significant ( $p = 0.0013$  for central and  $p = 0.001$  for matched  
841 condition)
